# Supplementary material for: Erosion and weathering in carbonate regions reveal climatic and tectonic drivers of carbonate landscape evolution
Source: Copernicus journal article supplement (doi:10.5194/esurf-11-247-2023), 2023-03-29
Supplement: Supplementary file 1 [file esurf-11-247-2023-supplement.zip]

## Weathering corrections for denudation rates

Chemical weathering can bias cosmogenic nuclide-derived denudation rates. Regolith weathering can overestimate  $^{36}\text{Cl}$  denudation rates because the soluble target mineral calcite may have a shorter regolith residence time than the bulk rock due to its high solubility. We use the methods proposed by Ott et al. (2022) to correct all alluvial denudation rates for regolith weathering. The correction requires knowledge of the regolith or bedrock composition. In the absence of direct bedrock compositional data, we use the reported bulk chemical composition of the samples as an estimate of regolith composition. We multiply the weight-percent CaO by 1.4 to estimate the calcite fraction in the regolith, take the  $\text{SiO}_2$  weight-percent as a fraction quartz, and assign the remainder as other insoluble minerals.

Additionally, we use the mean weathering rates for every area (Israel:  $21 \pm 3$  mm/ka, Crete:  $48 \pm 11$  mm/ka, France:  $37 \pm 8$  mm/ka) for the corrections. On Crete, we estimate 30 cm regolith thickness within the sampled catchments from the European soil database (ESDAC) (Panagos et al., 2012). We use this thickness in conjunction with a density of  $1.5 \text{ g/cm}^3$  to derive a soil mass of  $45 \text{ g/cm}^2$ . The same value is found in southern France, with soil depth estimated from the maps of Chen et al. (2019). For the Soreq catchment in Israel, Ryb et al. (2014b) report regolith thicknesses between 0 and 75 cm. We take the middle (37.5 cm) and use it with the reported regolith density of  $1.4 \text{ g/cm}^3$  to derive an average soil mass of  $52.5 \text{ g/cm}^2$ .

Weathering-corrected denudation rates are similar to conventional denudation rates, with a maximum difference of about 7% (Tab. S2). The sample compositions reported from southern France indicate almost pure limestone. Therefore, the bias for these rocks is minimal. For five samples, the weathering correction could not be applied because the reported nuclide concentration was greater than the theoretical maximum nuclide concentration for the provided parameter combination ( $N_{\text{max}}$ , for definition, see Ott et al., 2022). This is likely linked to uncertainties in the input parameters, such as weathering rate, regolith mass, etc. For some samples considered here, the actual catchment weathering rate is possibly lower than the mean weathering rate for the area. However, the distribution of water sampling stations does not allow deriving weathering rates close to every location sampled for cosmogenic nuclides. In general, the weathering bias in the investigated samples is low due to the low weathering rates and clean limestone composition of many samples. Because the corrections are low and uncertainty exists in some of the correction parameters, we chose to report uncorrected denudation rates in the main text.

Tab. S2: Output of weathering correction calculation for catchment-average denudation rates.

| Location     | Sample    | Denudation rate (mm/ka) | err   | Conventional denudation rate (mm/ka) | Rate difference %                                  |
|--------------|-----------|-------------------------|-------|--------------------------------------|----------------------------------------------------|
| Crete        | Cl-617-2  | 87.3                    | 7.0   | 93.8                                 | 6.9                                                |
| Crete        | Cl-617-3  |                         |       |                                      | rate could not be calculated because $N > N_{max}$ |
| Crete        | Cl-617-6  | 108.5                   | 5.4   | 111.9                                | 3.0                                                |
| Crete        | Cl-617-8  | 159.8                   | 22.5  | 166.0                                | 3.7                                                |
| Crete        | Cl-617-10 | 141.5                   | 9.5   | 146.0                                | 3.0                                                |
| Crete        | Cl-617-15 | 142.0                   | 13.4  | 144.7                                | 1.9                                                |
| Crete        | WC-616-8  | 521.5                   | 117.1 | 531.8                                | 1.9                                                |
| France       | BRO1B-G   | 63.0                    | 11.5  | 62.2                                 | 1.1                                                |
| France       | ORM01B-G  |                         |       | 37.8                                 | rate could not be calculated because $N > N_{max}$ |
| France       | ORM02B-G  | 72.6                    | 23.4  | 72.0                                 | 0.8                                                |
| France       | ORM02B-S  | 81.7                    | 21.7  | 80.9                                 | 0.9                                                |
| France       | ORM03B-G  | 67.1                    | 23.3  | 66.5                                 | 1.0                                                |
| France       | ORM03B-S  | 67.9                    | 20.5  | 67.2                                 | 1.0                                                |
| France       | PLBS-1G   | 56.4                    | 8.0   | 56.1                                 | 0.4                                                |
| France       | PLBS-1S   |                         |       | 48.9                                 | rate could not be calculated because $N > N_{max}$ |
| France       | PLBS-2S   | 53.9                    | 7.3   | 53.7                                 | 0.3                                                |
| France       | PLBS-3G   | 100.7                   | 19.8  | 100.6                                | 0.1                                                |
| France       | PLBS-4G   | 84.4                    | 14.7  | 84.1                                 | 0.4                                                |
| France       | PLS-E1    | 67.4                    | 19.3  | 67.2                                 | 0.3                                                |
| France       | PLS-E2    | 75.1                    | 22.1  | 74.9                                 | 0.2                                                |
| France       | REC01B-S  | 98.3                    | 28.1  | 97.9                                 | 0.4                                                |
| France       | REC02B-G  | 93.3                    | 28.1  | 93.1                                 | 0.3                                                |
| France       | REC02B-S  | 101.8                   | 35.0  | 101.4                                | 0.4                                                |
| France       | ROQ01B-G  | 59.7                    | 11.3  | 59.1                                 | 1.0                                                |
| France       | ROQ01B-S  | 70.8                    | 12.8  | 70.4                                 | 0.6                                                |
| France       | TAP01B-G  | 60.0                    | 19.6  | 59.5                                 | 0.9                                                |
| France       | TAP01B-S  | 74.1                    | 21.0  | 73.6                                 | 0.6                                                |
| France       | TAP02B-G  | 53.5                    | 17.4  | 53.0                                 | 1.0                                                |
| France       | TAP02B-S  | 56.6                    | 17.9  | 56.2                                 | 0.8                                                |
| France       | VID01B-S  | 64.7                    | 10.6  | 64.3                                 | 0.7                                                |
| France       | VID02B-S  | 82.5                    | 15.3  | 82.1                                 | 0.5                                                |
| Israel/Soreq | SQSED1    |                         |       | 41.5                                 | rate could not be calculated because $N > N_{max}$ |
| Israel/Soreq | SQSED2    | 60.8                    | 1.4   | 63.4                                 | 4.1                                                |
| Israel/Soreq | SQSED3    | 59.6                    | 1.3   | 61.1                                 | 2.5                                                |
| Israel/Soreq | SQSED4    | 117.3                   | 5.3   | 118.7                                | 1.1                                                |
| Israel/Soreq | SQSED5    | 50.5                    | 0.4   | 53.1                                 | 4.9                                                |

|              |        |      |     |      |                                                     |
|--------------|--------|------|-----|------|-----------------------------------------------------|
| Israel/Soreq | SQSED6 | 58.6 | 1.2 | 59.9 | 2.1                                                 |
| Israel/Soreq | SQSED7 |      |     | 49.8 | rate could not be calculated because $N > N_{\max}$ |

Tab S3: Raw and precipitation corrected water data from southern France.  $[Ca^{2+}]$  and  $[Mg^{2+}]$ . *n* – number of samples, min – minimum concentration, max – maximum concentration measured.

| National Code of station | Area            | Lon (°) | Lat (°) | Ca (mg/l) |       |       |         |           | Mg (mg/l) |      |      |         |           | Cl (mg/l) |      |      |         |
|--------------------------|-----------------|---------|---------|-----------|-------|-------|---------|-----------|-----------|------|------|---------|-----------|-----------|------|------|---------|
|                          |                 |         |         | n         | min   | max   | average | corrected | n         | min  | max  | average | corrected | n         | min  | max  | average |
| 09678X0109/HY            | Luberon         | 5.3802  | 43.8203 | 1         | 91.8  | 91.8  | 91.8    | 91.7      | 1         | 3.4  | 3.4  | 3.4     | 3.1       | 1         | 5.1  | 5.1  | 5.1     |
| 09685X0011/F             | Luberon         | 5.4057  | 43.8285 | 5         | 77.0  | 85.2  | 80.9    | 80.8      | 5         | 6.5  | 8.7  | 7.6     | 7.3       | 10        | 3.7  | 4.8  | 4.5     |
| 09681X0069/FO            | Luberon         | 5.4622  | 43.8399 | 2         | 102.4 | 110.0 | 106.2   | 106.0     | 2         | 3.4  | 3.5  | 3.5     | 2.7       | 2         | 10.1 | 11.4 | 10.8    |
| 09685X0013/F             | Luberon         | 5.4171  | 43.7862 | 3         | 80.0  | 93.5  | 87.2    | 87.1      | 3         | 1.3  | 1.5  | 1.4     | 1.0       | 3         | 6.1  | 6.5  | 6.3     |
| 09685X0012/HY            | Luberon         | 5.4226  | 43.7868 | 3         | 82.8  | 88.9  | 86.2    | 86.2      | 3         | 4.9  | 6.3  | 5.8     | 5.7       | 3         | 0.8  | 1.4  | 1.0     |
| 09674X0089/F             | Luberon         | 5.3852  | 43.8361 | 3         | 68.0  | 74.0  | 70.7    | 70.4      | 3         | 2.6  | 3.5  | 3.0     | 2.1       | 3         | 13.9 | 14.9 | 14.3    |
| 09686X0019/F             | Luberon         | 5.5380  | 43.7930 | 31        | 104.0 | 123.0 | 112.7   | 112.6     | 31        | 7.0  | 9.5  | 8.1     | 7.8       | 31        | 4.1  | 8.0  | 5.1     |
| 09676X0053/P             | Luberon         | 5.1791  | 43.7531 | 7         | 55.0  | 120.0 | 103.4   | 102.9     | 7         | 4.4  | 16.1 | 13.5    | 11.8      | 8         | 10.7 | 31.0 | 25.7    |
| 09175X0016/HY            | Lure            | 5.7888  | 44.1090 | 3         | 49.0  | 53.5  | 50.8    | 50.8      | 3         | 0.5  | 0.5  | 0.5     | 0.3       | 18        | 0.8  | 9.2  | 2.3     |
| 09431X0010/HY            | Lure            | 5.8374  | 44.0668 | 5         | 46.0  | 65.5  | 59.4    | 59.3      | 5         | 0.5  | 1.5  | 1.0     | 0.8       | 24        | 2.3  | 9.2  | 3.3     |
| 09176X0008/TX            | Lure            | 5.8944  | 44.1311 | 3         | 61.0  | 65.6  | 63.9    | 63.8      | 3         | 9.2  | 10.8 | 9.9     | 9.6       | 4         | 2.5  | 6.1  | 4.1     |
| 09431X0013/HY            | Lure            | 5.7859  | 44.0506 | 1         | 87.0  | 87.0  | 87.0    | 86.9      | 1         | 1.9  | 1.9  | 1.9     | 1.6       | 6         | 3.8  | 5.1  | 4.3     |
| 09424X0015/HY            | Lure            | 5.7059  | 44.0956 | 1         | 62.0  | 62.0  | 62.0    | 62.0      | 1         | 1.5  | 1.5  | 1.5     | 1.4       | 5         | 1.0  | 3.1  | 2.1     |
| 09153X1005/HY            | Ventoux         | 5.2895  | 44.1881 | 4         | 56.6  | 65.0  | 61.1    | 61.0      | 4         | 3.7  | 4.1  | 3.8     | 3.6       | 4         | 2.4  | 3.1  | 2.7     |
| 09153X1004/HY            | Ventoux         | 5.2734  | 44.2056 | 1         | 56.1  | 56.1  | 56.1    | 56.1      | 1         | 8.6  | 8.6  | 8.6     | 8.5       | 1         | 1.2  | 1.2  | 1.2     |
| 09154X1004/SO            | Ventoux         | 5.3148  | 44.1923 | 3         | 57.2  | 64.0  | 59.5    | 59.5      | 3         | 1.9  | 2.3  | 2.2     | 2.0       | 3         | 2.1  | 2.5  | 2.3     |
| 09157X0014/HY            | Ventoux         | 5.2233  | 44.1895 | 7         | 49.0  | 51.9  | 50.0    | 50.0      | 7         | 1.2  | 1.4  | 1.3     | 1.2       | 7         | 2.0  | 2.4  | 2.3     |
| 09165X1006/HY            | Ventoux         | 5.4139  | 44.1248 | 8         | 73.0  | 85.0  | 77.8    | 77.7      | 8         | 5.1  | 7.5  | 6.2     | 6.0       | 8         | 2.8  | 3.9  | 3.3     |
| 09156X0074/F             | Ventoux         | 5.2071  | 44.1833 | 8         | 64.5  | 70.4  | 67.0    | 67.0      | 8         | 1.4  | 2.1  | 1.7     | 1.5       | 9         | 1.9  | 2.4  | 2.2     |
| 10212X0020/HY            | Sainte Victoire | 5.5752  | 43.5188 | 3         | 60.6  | 139.6 | 89.1    | 88.6      | 3         | 5.5  | 27.6 | 13.2    | 11.8      | 3         | 17.0 | 27.9 | 21.1    |
| 10213X0051/P             | Sainte Victoire | 5.6411  | 43.5285 | 1         | 132.0 | 132.0 | 132.0   | 131.7     | 1         | 31.8 | 31.8 | 31.8    | 30.8      | 1         | 15.6 | 15.6 | 15.6    |
| 10213X0050/HY            | Sainte Victoire | 5.6422  | 43.5232 | 1         | 119.0 | 119.0 | 119.0   | 118.8     | 1         | 18.4 | 18.4 | 18.4    | 17.7      | 1         | 9.9  | 9.9  | 9.9     |
| 10213X0121/HY            | Sainte Victoire | 5.6013  | 43.5563 | 7         | 116.0 | 129.0 | 122.5   | 122.3     | 7         | 6.7  | 10.4 | 9.2     | 8.7       | 7         | 6.2  | 9.0  | 7.9     |
| 10451X0041/F             | Sainte Baume    | 5.7711  | 43.3098 | 2         | 61.4  | 118.0 | 89.7    | 89.5      | 2         | 20.8 | 63.5 | 42.2    | 41.4      | 3         | 7.5  | 17.2 | 10.9    |
| 10444X0028/F             | Sainte Baume    | 5.7559  | 43.3016 | 3         | 85.3  | 108.0 | 93.2    | 92.9      | 3         | 44.2 | 54.9 | 50.4    | 49.3      | 3         | 11.3 | 22.0 | 15.6    |
| 10444X0026/DA            | Sainte Baume    | 5.7099  | 43.2898 | 9         | 66.8  | 73.4  | 70.0    | 69.8      | 9         | 27.5 | 31.0 | 28.9    | 28.2      | 9         | 9.7  | 12.0 | 10.6    |
| 10443X0291/HY            | Sainte Baume    | 5.6600  | 43.2911 | 14        | 60.4  | 78.8  | 72.2    | 72.0      | 14        | 17.2 | 21.9 | 19.0    | 18.4      | 14        | 7.6  | 10.2 | 8.7     |

Tab. S4: Weathering rates calculated using estimated recharge areas from topography (Fig. S1) together with average P and AET values for the entire mountain range of the sampled spring, well or river.

|               |         |         |         |                               |                               | Estimated recharge areas |               |                            | Mountain range averages |               |                            |
|---------------|---------|---------|---------|-------------------------------|-------------------------------|--------------------------|---------------|----------------------------|-------------------------|---------------|----------------------------|
| Location      | Country | N (°)   | E (°)   | [Ca <sup>2+</sup> ]<br>(mg/l) | [Mg <sup>2+</sup> ]<br>(mg/l) | P (mm/a)                 | AET<br>(mm/a) | Dissolution rate<br>(mm/a) | P<br>(mm/a)             | AET<br>(mm/a) | Dissolution<br>rate (mm/a) |
| Agur1         | Israel  | 31.7207 | 34.9162 | 61                            | 35                            |                          |               |                            | 490                     | 291           | 0.021 ± 0.005              |
| Agur2         | Israel  | 31.7241 | 34.9139 | 56                            | 35                            |                          |               |                            | 490                     | 291           | 0.02 ± 0.004               |
| Agur3         | Israel  | 31.7074 | 34.9399 | 59                            | 33                            |                          |               |                            | 490                     | 291           | 0.02 ± 0.004               |
| Agur4         | Israel  | 31.6842 | 34.9803 | 62                            | 32                            |                          |               |                            | 490                     | 291           | 0.02 ± 0.004               |
| Agur5         | Israel  | 31.6796 | 34.9890 | 91                            | 34                            |                          |               |                            | 490                     | 291           | 0.026 ± 0.006              |
| Agur6         | Israel  | 31.6796 | 35.0088 | 58                            | 29                            |                          |               |                            | 490                     | 291           | 0.019 ± 0.004              |
| Agur7         | Israel  | 31.6789 | 35.0276 | 57                            | 29                            |                          |               |                            | 490                     | 291           | 0.018 ± 0.004              |
| Agur8         | Israel  | 31.7116 | 35.0106 | 70                            | 30                            |                          |               |                            | 490                     | 291           | 0.021 ± 0.005              |
| EnKarem1      | Israel  | 31.7795 | 35.1557 | 48                            | 14                            |                          |               |                            | 490                     | 291           | 0.013 ± 0.003              |
| EnKarem13     | Israel  | 31.7434 | 35.1531 | 53                            | 24                            |                          |               |                            | 490                     | 291           | 0.016 ± 0.004              |
| EnKarem14     | Israel  | 31.7986 | 35.1697 | 61                            | 27                            |                          |               |                            | 490                     | 291           | 0.019 ± 0.004              |
| EnKarem15     | Israel  | 31.7877 | 35.1622 | 65                            | 30                            |                          |               |                            | 490                     | 291           | 0.02 ± 0.005               |
| EnKarem16     | Israel  | 31.7447 | 35.1762 | 60                            | 25                            |                          |               |                            | 490                     | 291           | 0.018 ± 0.004              |
| EnKarem17     | Israel  | 31.7422 | 35.1643 | 36                            | 21                            |                          |               |                            | 490                     | 291           | 0.012 ± 0.003              |
| EnKarem3      | Israel  | 31.8002 | 35.1251 | 62                            | 33                            |                          |               |                            | 490                     | 291           | 0.02 ± 0.005               |
| EnKarem9      | Israel  | 31.8052 | 35.1716 | 55                            | 24                            |                          |               |                            | 490                     | 291           | 0.017 ± 0.004              |
| Karem9+1      | Israel  | 31.8052 | 35.1716 | 61                            | 26                            |                          |               |                            | 490                     | 291           | 0.018 ± 0.004              |
| Eshtaol1      | Israel  | 31.7769 | 35.0103 | 68                            | 37                            |                          |               |                            | 490                     | 291           | 0.022 ± 0.005              |
| Eshtaol2a     | Israel  | 31.7770 | 35.0126 | 66                            | 39                            |                          |               |                            | 490                     | 291           | 0.023 ± 0.005              |
| Eshtaol3      | Israel  | 31.8155 | 35.0232 | 74                            | 35                            |                          |               |                            | 490                     | 291           | 0.023 ± 0.005              |
| Eshtaol4      | Israel  | 31.7995 | 35.0120 | 85                            | 38                            |                          |               |                            | 490                     | 291           | 0.026 ± 0.006              |
| Eshtaol5      | Israel  | 31.7772 | 35.0255 | 59                            | 31                            |                          |               |                            | 490                     | 291           | 0.019 ± 0.004              |
| Eshtaol6      | Israel  | 31.8097 | 35.0151 | 85                            | 37                            |                          |               |                            | 490                     | 291           | 0.026 ± 0.006              |
| Eshtaol7      | Israel  | 31.7681 | 35.0122 | 52                            | 29                            |                          |               |                            | 490                     | 291           | 0.017 ± 0.004              |
| Eshtaol8      | Israel  | 31.8028 | 35.0189 | 65                            | 29                            |                          |               |                            | 490                     | 291           | 0.02 ± 0.004               |
| Eshtaol9      | Israel  | 31.7892 | 35.0161 | 69                            | 31                            |                          |               |                            | 490                     | 291           | 0.021 ± 0.005              |
| Hartuv3       | Israel  | 31.7605 | 35.0085 | 61                            | 37                            |                          |               |                            | 490                     | 291           | 0.021 ± 0.005              |
| Hartuv4       | Israel  | 31.7505 | 35.0001 | 68                            | 35                            |                          |               |                            | 490                     | 291           | 0.022 ± 0.005              |
| Modieen1      | Israel  | 31.8605 | 35.0330 | 80                            | 40                            |                          |               |                            | 490                     | 291           | 0.026 ± 0.006              |
| Modieen2      | Israel  | 31.8505 | 35.0435 | 81                            | 30                            |                          |               |                            | 490                     | 291           | 0.023 ± 0.005              |
| Modieen3      | Israel  | 31.8266 | 35.0307 | 66                            | 29                            |                          |               |                            | 490                     | 291           | 0.02 ± 0.004               |
| Modieen4      | Israel  | 31.8402 | 35.0361 | 60                            | 27                            |                          |               |                            | 490                     | 291           | 0.018 ± 0.004              |
| Uriya2        | Israel  | 31.7958 | 34.9491 | 58                            | 36                            |                          |               |                            | 490                     | 291           | 0.02 ± 0.005               |
| Uriya3        | Israel  | 31.8005 | 34.9576 | 66                            | 39                            |                          |               |                            | 490                     | 291           | 0.023 ± 0.005              |
| Uriya4        | Israel  | 31.8159 | 34.9178 | 76                            | 44                            |                          |               |                            | 490                     | 291           | 0.026 ± 0.006              |
| Uriya6        | Israel  | 31.8016 | 34.9508 | 80                            | 37                            |                          |               |                            | 490                     | 291           | 0.025 ± 0.006              |
| Uriya7        | Israel  | 31.7621 | 34.9643 | 77                            | 37                            |                          |               |                            | 490                     | 291           | 0.024 ± 0.005              |
| Uriya8        | Israel  | 31.8252 | 34.9428 | 88                            | 40                            |                          |               |                            | 490                     | 291           | 0.027 ± 0.006              |
| Uriya9a       | Israel  | 31.7950 | 34.9754 | 78                            | 38                            |                          |               |                            | 490                     | 291           | 0.025 ± 0.006              |
| 09678X0109/HY | France  | 43.8203 | 5.3802  | 91.7                          | 3.1                           | 794                      | 424           | 0.035 ± 0.008              | 773                     | 433           | 0.032 ± 0.007              |
| 09685X0011/F  | France  | 43.8285 | 5.4057  | 80.8                          | 7.3                           | 802                      | 443           | 0.032 ± 0.007              | 773                     | 433           | 0.03 ± 0.007               |
| 09681X0069/FO | France  | 43.8399 | 5.4622  | 106.0                         | 2.7                           | 833                      | 337           | 0.054 ± 0.012              | 773                     | 433           | 0.037 ± 0.008              |

|                |        |         |         |       |      |      |     |               |     |     |               |
|----------------|--------|---------|---------|-------|------|------|-----|---------------|-----|-----|---------------|
| 09685X0013/F   | France | 43.7862 | 5.4171  | 87.1  | 1.0  | 806  | 697 | 0.01 ± 0.002  | 773 | 433 | 0.03 ± 0.007  |
| 09685X0012/HY  | France | 43.7868 | 5.4226  | 86.2  | 5.7  | 823  | 701 | 0.011 ± 0.003 | 773 | 433 | 0.032 ± 0.007 |
| 09674X0089/F   | France | 43.8361 | 5.3852  | 70.4  | 2.1  | 761  | 398 | 0.026 ± 0.006 | 773 | 433 | 0.025 ± 0.006 |
| 09686X0019/F   | France | 43.7930 | 5.5380  | 112.6 | 7.8  | 793  | 418 | 0.046 ± 0.01  | 773 | 433 | 0.041 ± 0.009 |
| 09676X0053/P   | France | 43.7531 | 5.1791  | 102.9 | 11.8 | 707  | 484 | 0.026 ± 0.006 | 725 | 445 | 0.033 ± 0.007 |
| 09175X0016/HY  | France | 44.1090 | 5.7888  | 50.8  | 0.3  | 1081 | 647 | 0.022 ± 0.005 | 923 | 500 | 0.022 ± 0.005 |
| 09431X0010/HY  | France | 44.0668 | 5.8374  | 59.3  | 0.8  | 962  | 644 | 0.019 ± 0.004 | 923 | 500 | 0.025 ± 0.006 |
| 09176X0008/TX  | France | 44.1311 | 5.8944  | 63.8  | 9.6  | 894  | 184 | 0.054 ± 0.012 | 923 | 500 | 0.032 ± 0.007 |
| 09431X0013/HY  | France | 44.0506 | 5.7859  | 86.9  | 1.6  | 975  | 613 | 0.032 ± 0.007 | 923 | 500 | 0.038 ± 0.008 |
| 09424X0015/HY  | France | 44.0956 | 5.7059  | 62.0  | 1.4  | 1004 | 586 | 0.027 ± 0.006 | 923 | 500 | 0.027 ± 0.006 |
| 09153X1005/HY  | France | 44.1881 | 5.2895  | 61.0  | 3.6  | 1046 | 399 | 0.042 ± 0.009 | 912 | 444 | 0.031 ± 0.007 |
| 09153X1004/HY  | France | 44.2056 | 5.2734  | 56.1  | 8.5  | 999  | 345 | 0.043 ± 0.01  | 912 | 444 | 0.031 ± 0.007 |
| 09154X1004/SO  | France | 44.1923 | 5.3148  | 59.5  | 2.0  | 942  | 342 | 0.037 ± 0.008 | 912 | 444 | 0.029 ± 0.006 |
| 09157X0014/HY  | France | 44.1895 | 5.2233  | 50.0  | 1.2  | 963  | 259 | 0.036 ± 0.008 | 912 | 444 | 0.024 ± 0.005 |
| 09165X1006/HY  | France | 44.1248 | 5.4139  | 77.7  | 6.0  | 904  | 493 | 0.035 ± 0.008 | 912 | 444 | 0.04 ± 0.009  |
| 09156X0074/F   | France | 44.1833 | 5.2071  | 67.0  | 1.5  | 891  | 394 | 0.034 ± 0.008 | 912 | 444 | 0.032 ± 0.007 |
| 10212X0020/HY  | France | 43.5188 | 5.5752  | 88.6  | 11.8 | 744  | 378 | 0.038 ± 0.008 | 738 | 366 | 0.038 ± 0.009 |
| 10213X0051/P   | France | 43.5285 | 5.6411  | 131.7 | 30.8 | 776  | 336 | 0.074 ± 0.017 | 738 | 366 | 0.063 ± 0.014 |
| 10213X0050/HY  | France | 43.5232 | 5.6422  | 118.8 | 17.7 | 735  | 381 | 0.05 ± 0.011  | 738 | 366 | 0.052 ± 0.012 |
| 10213X0121/HY  | France | 43.5563 | 5.6013  | 122.3 | 8.7  | 758  | 340 | 0.055 ± 0.012 | 738 | 366 | 0.049 ± 0.011 |
| 10451X0041/F   | France | 43.3098 | 5.7711  | 89.5  | 41.4 | 794  | 464 | 0.046 ± 0.01  | 773 | 423 | 0.049 ± 0.011 |
| 10444X0028/F   | France | 43.3016 | 5.7559  | 92.9  | 49.3 | 790  | 439 | 0.054 ± 0.012 | 773 | 423 | 0.053 ± 0.012 |
| 10444X0026/DA  | France | 43.2898 | 5.7099  | 69.8  | 28.2 | 795  | 516 | 0.029 ± 0.006 | 773 | 423 | 0.036 ± 0.008 |
| 10443X0291/HY  | France | 43.2911 | 5.6600  | 72.0  | 18.4 | 748  | 488 | 0.025 ± 0.005 | 773 | 423 | 0.033 ± 0.007 |
| Kournas Lake   | Greece | 35.3310 | 24.2801 | 118.8 | 40.9 | 908  | 355 | 0.093 ± 0.021 | 900 | 287 | 0.103 ± 0.023 |
| Vrysses        | Greece | 35.3764 | 24.2010 | 62.8  | 9.2  | 892  | 345 | 0.04 ± 0.009  | 900 | 287 | 0.045 ± 0.01  |
| Agia Fotini    | Greece | 35.1396 | 24.5288 | 155.3 | 39.7 | 984  | 248 | 0.15 ± 0.033  | 962 | 397 | 0.115 ± 0.026 |
| Preveli        | Greece | 35.1635 | 24.4742 | 86.7  | 24.5 | 940  | 460 | 0.056 ± 0.012 | 962 | 397 | 0.066 ± 0.015 |
| Plakias        | Greece | 35.1930 | 24.3948 | 64.0  | 16.7 | 917  | 370 | 0.046 ± 0.01  | 962 | 397 | 0.048 ± 0.011 |
| Lyttos         | Greece | 35.2279 | 25.3620 | 45.5  | 8.4  | 877  | 350 | 0.029 ± 0.007 | 799 | 347 | 0.025 ± 0.006 |
| Samaria        | Greece | 35.4371 | 24.1267 | 29.4  | 14.6 | 876  | 315 | 0.026 ± 0.006 | 900 | 287 | 0.029 ± 0.006 |
| Selena         | Greece | 35.2905 | 25.5310 | 29.8  | 10.8 | 847  | 292 | 0.024 ± 0.005 | 799 | 347 | 0.019 ± 0.004 |
| Lentas         | Greece | 34.9518 | 24.9276 | 51.7  | 30.0 | 847  | 226 | 0.055 ± 0.012 | 770 | 215 | 0.049 ± 0.011 |
| Rouvas         | Greece | 35.1381 | 24.9606 | 19.7  | 13.0 | 1011 | 263 | 0.027 ± 0.006 | 900 | 287 | 0.022 ± 0.005 |
| Stylos         | Greece | 35.4353 | 24.1274 | 23.6  | 12.0 | 876  | 315 | 0.021 ± 0.005 | 900 | 287 | 0.023 ± 0.005 |
| Kiliaris River | Greece | 35.4604 | 24.1551 | 39.8  | 5.3  | 785  | 435 | 0.016 ± 0.004 | 900 | 287 | 0.028 ± 0.006 |
| Zaros          | Greece | 35.1415 | 24.9065 | 28.0  | 14.0 | 1013 | 257 | 0.034 ± 0.008 | 988 | 282 | 0.032 ± 0.007 |
| Aposelemis     | Greece | 35.3298 | 25.3333 | 112.4 | 23.9 | 795  | 415 | 0.054 ± 0.012 | 799 | 347 | 0.064 ± 0.014 |
| Kourna Lake    | Greece | 35.3304 | 24.2753 | 101.6 | 43.3 | 908  | 355 | 0.085 ± 0.019 | 900 | 287 | 0.094 ± 0.021 |
| Kourtaliotis   | Greece | 35.1548 | 24.4730 | 72.3  | 24.9 | 940  | 460 | 0.049 ± 0.011 | 962 | 397 | 0.058 ± 0.013 |

Tab. S5: Pearson's  $r$  and  $p$  values for the correlation of topographic and climatic variables from catchments with alluvial samples.

| Pearson's $r$      | Denudation | Mean elevation | Mean precipitation | Mean AET | Mean runoff | Mean local relief | Mean slope |
|--------------------|------------|----------------|--------------------|----------|-------------|-------------------|------------|
| Denudation         | 1.000      | 0.470          | 0.684              | 0.357    | 0.387       | 0.652             | 0.503      |
| Mean elevation     | 0.470      | 1.000          | 0.249              | -0.335   | 0.631       | 0.338             | 0.024      |
| Mean precipitation | 0.684      | 0.249          | 1.000              | 0.577    | 0.509       | 0.773             | 0.797      |
| Mean AET           | 0.357      | -0.335         | 0.577              | 1.000    | -0.409      | 0.372             | 0.648      |
| Mean runoff        | 0.387      | 0.631          | 0.509              | -0.409   | 1.000       | 0.473             | 0.207      |
| Mean local relief  | 0.652      | 0.338          | 0.773              | 0.372    | 0.473       | 1.000             | 0.872      |
| Mean slope         | 0.503      | -0.024         | 0.797              | 0.648    | 0.207       | 0.872             | 1.000      |
| p-values           | Denudation | Mean elevation | Mean precipitation | Mean AET | Mean runoff | Mean local relief | Mean slope |
| Denudation         | 1.000      | 0.002          | 0.000              | 0.020    | 0.011       | 0.000             | 0.001      |
| Mean elevation     | 0.002      | 1.000          | 0.112              | 0.030    | 0.000       | 0.029             | 0.879      |
| Mean precipitation | 0.000      | 0.112          | 1.000              | 0.000    | 0.001       | 0.000             | 0.000      |
| Mean AET           | 0.020      | 0.030          | 0.000              | 1.000    | 0.007       | 0.015             | 0.000      |
| Mean runoff        | 0.011      | 0.000          | 0.001              | 0.007    | 1.000       | 0.002             | 0.187      |
| Mean local relief  | 0.000      | 0.029          | 0.000              | 0.015    | 0.002       | 1.000             | 0.000      |
| Mean slope         | 0.001      | 0.879          | 0.000              | 0.000    | 0.187       | 0.000             | 1.000      |

Tab. S6: Pearson's  $r$  and  $p$  values for the correlation of topographic and climatic variables from catchments with weathering rates.

| Pearson's $r$      | Weathering rate | Mean slope | Mean local relief | Mean precipitation | Mean runoff |
|--------------------|-----------------|------------|-------------------|--------------------|-------------|
| Weathering rate    | 1.000           | 0.382      | 0.517             | 0.522              | 0.503       |
| Mean slope         | 0.382           | 1.000      | 0.944             | 0.671              | 0.687       |
| Mean local relief  | 0.517           | 0.944      | 1.000             | 0.769              | 0.833       |
| Mean precipitation | 0.522           | 0.671      | 0.769             | 1.000              | 0.851       |
| Mean runoff        | 0.503           | 0.687      | 0.833             | 0.851              | 1.000       |
| p-values           | Weathering rate | Mean slope | Mean local relief | Mean precipitation | Mean runoff |
| Weathering rate    | 1.000           | 0.000      | 0.000             | 0.000              | 0.000       |
| Mean slope         | 0.000           | 1.000      | 0.000             | 0.000              | 0.000       |
| Mean local relief  | 0.000           | 0.000      | 1.000             | 0.000              | 0.000       |
| Mean precipitation | 0.000           | 0.000      | 0.000             | 1.000              | 0.000       |
| Mean runoff        | 0.000           | 0.000      | 0.000             | 0.000              | 1.000       |



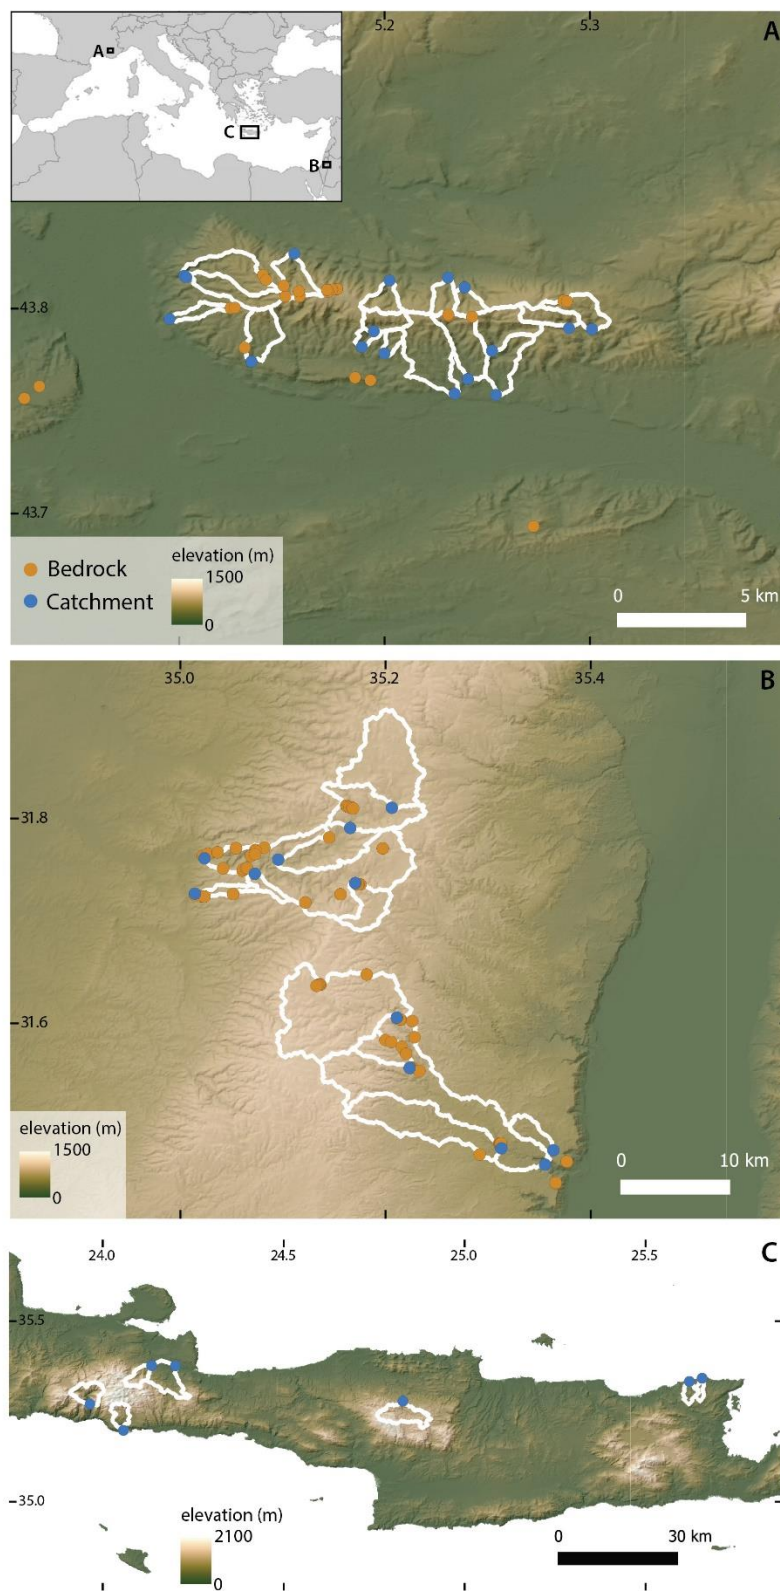

*Fig. S1: Overview of catchments sampled for catchment-average denudation rates in southern France (A), Israel (B), and Crete (C), with nearby bedrock  $^{36}\text{Cl}$  sampling locations.*

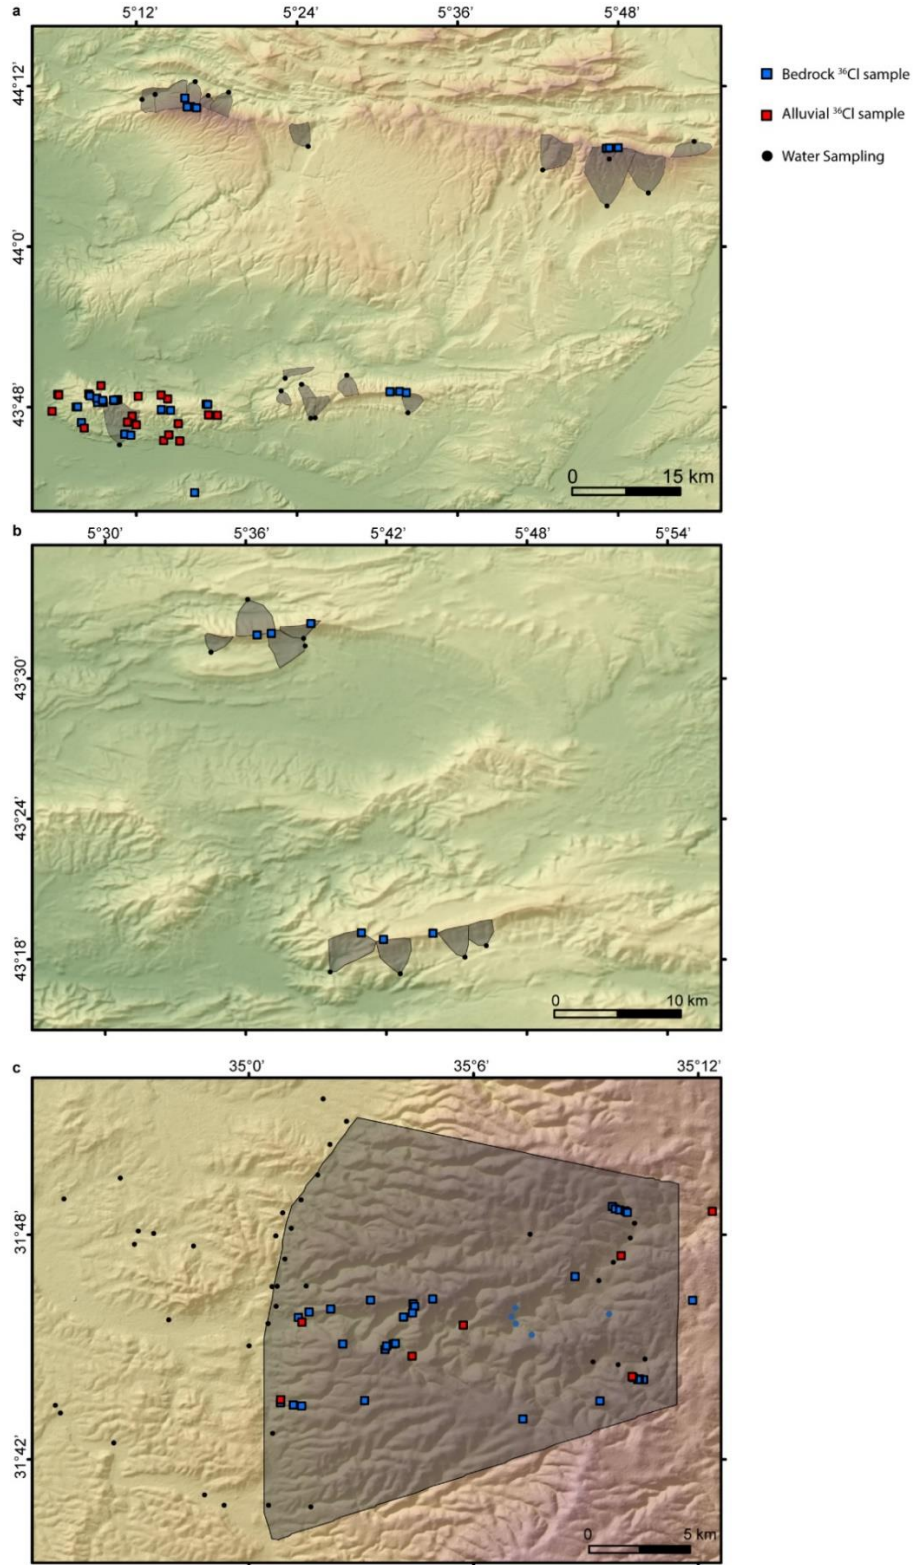

Fig. S2: Hypothetical recharge areas used to calculate the water flux required for the carbonate dissolution rate calculation for wells and springs. (a) and (b) show recharge areas for southern France, (c) for Israel, where the Western Mountain Aquifer provides the water for most wells in the coastal plain (Sheffer et al., 2010).

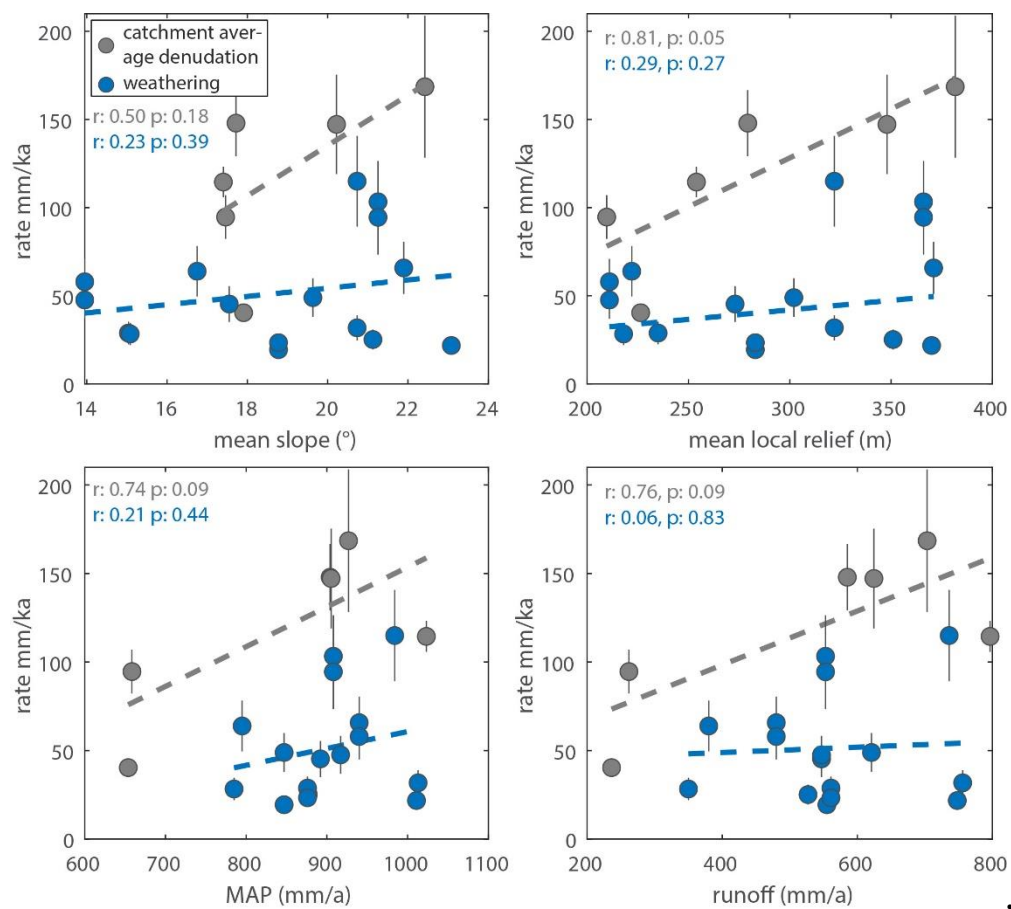

*Fig S3: Correlations between catchment average  $^{36}\text{Cl}$  denudation rates, carbonate weathering rates, and topographic and climatic metrics for samples from Crete. Values of correlation coefficient and p-values displayed for catchment-average denudation and weathering rates.*

## References

- Avni, S., Joseph-Hai, N., Haviv, I., Matmon, A., Benedetti, L., and Team, A., 2018, Patterns and rates of 103–105 yr denudation in carbonate terrains under subhumid to subalpine climatic gradient, Mount Hermon, Israel: *GSA Bulletin*, v. 131, p. 899–912, doi:10.1130/B31973.1.
- Ben-Asher, M., Haviv, I., Crouvi, O., Roering, J.J., and Matmon, A., 2021, The convexity of carbonate hilltops:  $^{36}\text{Cl}$  constraints on denudation and chemical weathering rates and implications for hillslope curvature: *GSA Bulletin*, doi:10.1130/b35658.1.
- Chen, S., Mulder, V.L., Martin, M.P., Walter, C., Lacoste, M., Richer-de-Forges, A.C., Saby, N.P.A., Loiseau, T., Hu, B., and Arrouays, D., 2019, Probability mapping of soil thickness by random survival forest at a national scale: *Geoderma*, v. 344, p. 184–194, doi:10.1016/J.GEODERMA.2019.03.016.
- Godard, V., Ollivier, V., Bellier, O., Miramont, C., Shabanian, E., Fleury, J., Benedetti, L., and Guillou, V., 2016, Weathering-limited hillslope evolution in carbonate landscapes: *Earth and Planetary Science Letters*, v. 446, p. 10–20, doi:10.1016/j.epsl.2016.04.017.
- Matsushi, Y., Sasa, K., Takahashi, T., Sueki, K., Nagashima, Y., and Matsukura, Y., 2010, Denudation rates of carbonate pinnacles in Japanese karst areas: Estimates from cosmogenic  $^{36}\text{Cl}$  in calcite: *Nuclear Instruments and Methods in Physics Research Section B: Beam Interactions with Materials and Atoms*, v. 268, p. 1205–1208, doi:10.1016/j.nimb.2009.10.134 M4 - Citavi.
- Ott, R.F., 2022, WeCode - Weathering Corrections for denudation rates V. 1.0: GFZ Data Services, doi:10.5880/GFZ.4.6.2022.001.
- Ott, R.F., Gallen, S.F., Caves-Rugenstein, J.K., Ivy-Ochs, S., Helman, D., Fassoulas, C., Vockenhuber, C., Christl, M., and Willett, S.D., 2019, Chemical versus mechanical denudation in meta-clastic and carbonate bedrock catchments on Crete, Greece, and mechanisms for steep and high carbonate topography: *Journal of Geophysical Research Earth Surface*, doi:10.1029/2019JF005142.
- Ott, R.F., Gallen, S.F., and Granger, D.E., 2022, Cosmogenic nuclide weathering biases: Corrections and potential for denudation and weathering rate measurements: *Geochronology Discussions*, doi:10.5194/gchron-2022-5.
- Panagos, P., Van Liedekerke, M., Jones, A., and Montanarella, L., 2012, European Soil Data Centre: Response to European policy support and public data requirements: *Land Use Policy*, v. 29, p. 329–338, doi:10.1016/j.landusepol.2011.07.003.
- Ryb, U., Matmon, A., Erel, Y., Haviv, I., Benedetti, L., and Hidy, A.J., 2014a, Styles and rates of long-term denudation in carbonate terrains under a Mediterranean to hyper-arid climatic gradient: *Earth and Planetary Science Letters*, v. 406, p. 142–152, doi:10.1016/j.epsl.2014.09.008.
- Ryb, U., Matmon, A., Erel, Y., Haviv, I., Katz, A., Starinsky, A., Angert, A., and Team, A., 2014b,

- Controls on denudation rates in tectonically stable Mediterranean carbonate terrain: *GSA Bulletin*, v. 126, p. 553–568, doi:10.1130/B30886.1.
- Sheffer, N.A., Dafny, E., Gvirtzman, H., Navon, S., Frumkin, A., and Morin, E., 2010, Hydrometeorological daily recharge assessment model (DREAM) for the Western Mountain Aquifer, Israel: Model application and effects of temporal patterns: *Water Resources Research*, v. 46, p. 251, doi:10.1029/2008WR007607.
- Thomas, F. et al., 2018, Limited influence of climatic gradients on the denudation of a Mediterranean carbonate landscape: *Geomorphology*, v. 316, p. 44–58, doi:10.1016/j.geomorph.2018.04.014.
- Thomas, F. et al., 2017, Morphological controls on the dynamics of carbonate landscapes under a mediterranean climate: *Terra Nova*, v. 29, p. 173–182, doi:10.1111/ter.12260.
- Xu, S., Liu, C., Freeman, S., Lang, Y., Schnabel, C., Tu, C., Wilcken, K., and Zhao, Z., 2013, In-situ cosmogenic  $^{36}\text{Cl}$  denudation rates of carbonates in Guizhou karst area: *Chinese Science Bulletin*, v. 58, p. 2473–2479, doi:10.1007/s11434-013-5756-8.
- Yang, Y., Lang, Y.C., Xu, S., Liu, C.Q., Cui, L.F., Freeman, S.P.H.T., and Wilcken, K.M., 2020, Combined unsteady denudation and climatic gradient factors constrain carbonate landscape evolution: New insights from in situ cosmogenic  $^{36}\text{Cl}$ : *Quaternary Geochronology*, v. 58, p. 101075, doi:10.1016/J.QUAGEO.2020.101075.
