# Supplementary material for: Erosion and weathering in carbonate regions reveal climatic and tectonic drivers of carbonate landscape evolution
Source: Copernicus journal article supplement (doi:10.5194/esurf-11-247-2023), 2023-03-29
Supplement: Supplementary file 1 [file Tab_S1.xlsx]

## Sheet: 36Cl Cronus
Reference	Type	Name	latitude	longitude	elevation	Pressure	sample thickness	bulk density	Shielding	Erosion rate	Conc. Cl-36	inheritance	Lambda Effective	Depth to Top of sample	Year Collected	Water content in pores	SiO2 [%]	TiO2 [%]	Al2O3 [%]	Fe2O3 [%]	MnO [%]	MgO [%]	CaO [%]	Na2O [%]	K2O [%]	P2O5 [%]	Analytical Water	CO2 [%]	Cl (ppm)	B (ppm)	Sm (ppm)	Gd (ppm)	U (ppm)	Th (ppm)	Cr(ppm)	Li(ppm)	Target K2O[%]	Target CaO[%]	Target TiO2[%]	Target Fe2O3[%]	Target Cl[ppm]	latitude +/-	longitude +/-	elevation +/-	Pressure +/-	sample thickness +/-	bulk density +/-	Shielding +/-	Erosion rate +/-
		-	dd	dd	m	hPa	cm	g/cm3	unitless	mm/kyr	at Cl-36/g sample	at Cl-36/g	g/cm2	g/cm2	Year AD	Volumetric fraction	bulk rock weight%	bulk rock weight%	bulk rock weight%	bulk rock weight%	bulk rock weight%	bulk rock weight%	bulk rock weight%	bulk rock weight%	bulk rock weight%	bulk rock weight%	bulk rock weight%	bulk rock weight%	bulk rock weight%	bulk rock weight%	bulk rock weight%	bulk rock weight%	bulk rock weight%	bulk rock weight%	bulk rock weight%	bulk rock weight%	target weight%	target weight%	target weight%	target weight%	target weight%	dd	dd	m	hPa	cm	g/cm3	unitless	mm/kyr
Thomas et al.(2018)	Bedrock	NE2	43.341	5.2403	211		3	2.55	1	0	1322000	0	153	8	2000	0	0	0	0	0	0	0	56.295	0	0	0	0	44.4731	24.25	0	0	0	0	0	0	0	0	56.295	0	0	24.25						0.1
Thomas et al.(2018)	Bedrock	NE3	43.3562	5.1596	163		3	2.55	1	0	1.64e+06	0	153	8	2000	0	0	0	0	0	0	0	53.793	0	0	0	0	42.4965	9.61	0	0	0	0	0	0	0	0	53.793	0	0	9.61						0.1
Thomas et al.(2018)	Bedrock	CA1	43.22	5.4363	230		3	2.55	1	0	1115000	0	153	8	2000	0	0	0	0	0	0	0	56.712	0	0	0	0	44.8025	13.96	0	0	0	0	0	0	0	0	56.712	0	0	13.96						0.1
Thomas et al.(2018)	Bedrock	CA3	43.2321	5.4638	382		3	2.55	1	0	1164000	0	153	8	2000	0	0	0	0	0	0	0	55.183	0	0	0	0	43.5946	10.17	0	0	0	0	0	0	0	0	55.183	0	0	10.17						0.1
Thomas et al.(2018)	Bedrock	AL1	43.7561	5.0245	260		3	2.55	1	0	1637000	0	153	8	2000	0	0	0	0	0	0	0	65.469	0	0	0	0	51.7205	4.59	0	0	0	0	0	0	0	0	65.469	0	0	4.59						0.1
Thomas et al.(2018)	Bedrock	AL4	43.762	5.0318	240		3	2.55	1	0	1033000	0	153	8	2000	0	0	0	0	0	0	0	53.237	0	0	0	0	42.0572	7.14	0	0	0	0	0	0	0	0	53.237	0	0	7.14						0.1
Thomas et al.(2018)	Bedrock	SB2	43.3187	5.7332	984		3	2.55	1	0	1212000	0	153	8	2000	0	0	0	0	0	0	0	56.712	0	0	0	0	44.8025	3.81	0	0	0	0	0	0	0	0	56.712	0	0	3.81						0.1
Thomas et al.(2018)	Bedrock	SB5	43.3143	5.6979	997		3	2.55	1	0	1.719e+06	0	153	8	2000	0	0	0	0	0	0	0	55.6	0	0	0	0	43.924	7.31	0	0	0	0	0	0	0	0	55.6	0	0	7.31						0.1
Thomas et al.(2018)	Bedrock	SB7	43.3189	5.6823	865		3	2.55	1	0	1.976e+06	0	153	8	2000	0	0	0	0	0	0	0	55.878	0	0	0	0	44.1436	80.83	0	0	0	0	0	0	0	0	55.878	0	0	80.83						0.1
Thomas et al.(2018)	Bedrock	GL1	43.8192	5.5158	1051		3	2.55	1	0	883000	0	153	8	2000	0	0	0	0	0	0	0	55.183	0	0	0	0	43.5946	25.6	0	0	0	0	0	0	0	0	55.183	0	0	25.6						0.1
Thomas et al.(2018)	Bedrock	GL3	43.8196	5.5277	1049		3	2.55	1	0	658000	0	153	8	2000	0	0	0	0	0	0	0	56.017	0	0	0	0	44.2534	22.81	0	0	0	0	0	0	0	0	56.017	0	0	22.81						0.1
Thomas et al.(2018)	Bedrock	GL4	43.8182	5.5361	1032		3	2.55	1	0	1217000	0	153	8	2000	0	0	0	0	0	0	0	55.044	0	0	0	0	43.4848	12.06	0	0	0	0	0	0	0	0	55.044	0	0	12.06						0.1
Thomas et al.(2018)	Bedrock	LF1	43.5625	5.211	219		3	2.55	1	0	1154000	0	153	8	2000	0	0	0	0	0	0	0	55.6	0	0	0	0	43.924	3.78	0	0	0	0	0	0	0	0	55.6	0	0	3.78						0.1
Thomas et al.(2018)	Bedrock	LF2	43.5613	5.1963	192		3	2.55	1	0	893000	0	153	8	2000	0	0	0	0	0	0	0	55.878	0	0	0	0	44.1436	6.58	0	0	0	0	0	0	0	0	55.878	0	0	6.58						0.1
Thomas et al.(2018)	Bedrock	CO1	43.6937	5.2725	477		3	2.55	1	0	1.649e+06	0	153	8	2000	0	0	0	0	0	0	0	56.851	0	0	0	0	44.9123	3.64	0	0	0	0	0	0	0	0	56.851	0	0	3.64						0.1
Thomas et al.(2018)	Bedrock	VE1	44.1743	5.2678	1835		3	2.55	1	0	2127000	0	153	8	2000	0	0	0	0	0	0	0	55.461	0	0	0	0	43.8142	12.1	0	0	0	0	0	0	0	0	55.461	0	0	12.1						0.1
Thomas et al.(2018)	Bedrock	VE2	44.174	5.2633	1838		3	2.55	1	0	3361000	0	153	8	2000	0	0	0	0	0	0	0	55.322	0	0	0	0	43.7044	4.66	0	0	0	0	0	0	0	0	55.322	0	0	4.66						0.1
Thomas et al.(2018)	Bedrock	VE4	44.173	5.2749	1851		3	2.55	1	0	2727000	0	153	8	2000	0	0	0	0	0	0	0	55.044	0	0	0	0	43.4848	7.38	0	0	0	0	0	0	0	0	55.044	0	0	7.38						0.1
Thomas et al.(2018)	Bedrock	VE5	44.1851	5.2604	1440		3	2.55	1	0	2260000	0	153	8	2000	0	0	0	0	0	0	0	53.376	0	0	0	0	42.167	16.21	0	0	0	0	0	0	0	0	53.376	0	0	16.21						0.1
Thomas et al.(2018)	Bedrock	LU1	44.1225	5.7853	1725		3	2.55	1	0	922000	0	153	8	2000	0	0	0	0	0	0	0	56.156	0	0	0	0	44.3632	16.8	0	0	0	0	0	0	0	0	56.156	0	0	16.8						0.1
Thomas et al.(2018)	Bedrock	LU2	44.1231	5.7887	1751		3	2.55	1	0	979000	0	153	8	2000	0	0	0	0	0	0	0	54.766	0	0	0	0	43.2651	14.14	0	0	0	0	0	0	0	0	54.766	0	0	14.14						0.1
Thomas et al.(2018)	Bedrock	LU3	44.1232	5.8	1795		3	2.55	1	0	830000	0	153	8	2000	0	0	0	0	0	0	0	56.017	0	0	0	0	44.2534	20.06	0	0	0	0	0	0	0	0	56.017	0	0	20.06						0.1
Thomas et al.(2018)	Bedrock	SV1	43.5321	5.6182	1012		3	2.55	1	0	2178000	0	153	8	2000	0	0	0	0	0	0	0	54.488	0	0	0	0	43.0455	13.32	0	0	0	0	0	0	0	0	54.488	0	0	13.32						0.1
Thomas et al.(2018)	Bedrock	SV3	43.531	5.6081	1004		3	2.55	1	0	2431000	0	153	8	2000	0	0	0	0	0	0	0	56.99	0	0	0	0	45.0221	6.76	0	0	0	0	0	0	0	0	56.99	0	0	6.76						0.1
Thomas et al.(2018)	Bedrock	SV4	43.5391	5.6463	1000		3	2.55	1	0	1.631e+06	0	153	8	2000	0	0	0	0	0	0	0	55.322	0	0	0	0	43.7044	22.45	0	0	0	0	0	0	0	0	55.322	0	0	22.45						0.1
Thomas et al. (2017)	Clasts	MAY01C-A	43.7809	5.1318	366		3	2.55	1	0	827000	0	153	8	2000	0	0	0	0	0	0	0	56.295	0	0	0	0	44.4731	47.07	0	0	0	0	0	0	0	0	56.295	0	0	47.07						0.1
Thomas et al. (2017)	Clasts	PLCR-01A	43.8038	5.2871	653		3	2.55	1	0	1431000	0	153	8	2000	0	0	0	0	0	0	0	53.098	0	0	0	0	41.9474	1.42	0	0	0	0	0	0	0	0	53.098	0	0	1.42						0.1
Thomas et al. (2017)	Bedrock	PLCR-01B	43.8038	5.2871	653		3	2.55	1	0	1589000	0	153	8	2000	0	0	0	0	0	0	0	49.067	0	0	0	0	38.7629	2.62	0	0	0	0	0	0	0	0	49.067	0	0	2.62						0.1
Thomas et al. (2017)	Clasts	PLCR-02A	43.8035	5.2888	644		3	2.55	1	0	1192000	0	153	8	2000	0	0	0	0	0	0	0	54.21	0	0	0	0	42.8259	2.18	0	0	0	0	0	0	0	0	54.21	0	0	2.18						0.1
Thomas et al. (2017)	Bedrock	PLCR-02B	43.8035	5.2888	644		3	2.55	1	0	1484000	0	153	8	2000	0	0	0	0	0	0	0	53.793	0	0	0	0	42.4965	2.18	0	0	0	0	0	0	0	0	53.793	0	0	2.18						0.1
Thomas et al. (2017)	Clasts	PLCR-03A	43.7965	5.231	660		3	2.55	1	0	1404000	0	153	8	2000	0	0	0	0	0	0	0	53.515	0	0	0	0	42.2768	2.14	0	0	0	0	0	0	0	0	53.515	0	0	2.14						0.1
Thomas et al. (2017)	Bedrock	PLCR-03B	43.7965	5.231	660		3	2.55	1	0	1367000	0	153	8	2000	0	0	0	0	0	0	0	53.376	0	0	0	0	42.167	2.5	0	0	0	0	0	0	0	0	53.376	0	0	2.5						0.1
Thomas et al. (2017)	Clasts	PLCR-08A	43.796	5.2426	659		3	2.55	1	0	1501000	0	153	8	2000	0	0	0	0	0	0	0	52.681	0	0	0	0	41.618	1.16	0	0	0	0	0	0	0	0	52.681	0	0	1.16						0.1
Thomas et al. (2017)	Bedrock	PLCR-08B	43.796	5.2426	659		3	2.55	1	0	1456000	0	153	8	2000	0	0	0	0	0	0	0	52.82	0	0	0	0	41.7278	1.69	0	0	0	0	0	0	0	0	52.82	0	0	1.69						0.1
Thomas et al. (2017)	Clasts	PHA01C-A	43.7663	5.1856	384		3	2.55	1	0	1216000	0	153	8	2000	0	0	0	0	0	0	0	53.376	0	0	0	0	42.167	2.56	0	0	0	0	0	0	0	0	53.376	0	0	2.56						0.1
Thomas et al. (2017)	Bedrock	PHA01C-B	43.7663	5.1856	384		3	2.55	1	0	1336000	0	153	8	2000	0	0	0	0	0	0	0	59.214	0	0	0	0	46.7791	1.37	0	0	0	0	0	0	0	0	59.214	0	0	1.37						0.1
Thomas et al. (2017)	Clasts	PHA02C-A	43.765	5.1931	374		3	2.55	1	0	1398000	0	153	8	2000	0	0	0	0	0	0	0	58.102	0	0	0	0	45.9006	4.43	0	0	0	0	0	0	0	0	58.102	0	0	4.43						0.1
Thomas et al. (2017)	Bedrock	PHA02C-B	43.765	5.1931	374		3	2.55	1	0	1220000	0	153	8	2000	0	0	0	0	0	0	0	54.349	0	0	0	0	42.9357	4.04	0	0	0	0	0	0	0	0	54.349	0	0	4.04						0.1
Thomas et al. (2017)	Clasts	VID03C-A	43.8002	5.125	548		3	2.55	1	0	1093000	0	153	8	2000	0	0	0	0	0	0	0	53.237	0	0	0	0	42.0572	5.48	0	0	0	0	0	0	0	0	53.237	0	0	5.48						0.1
Thomas et al. (2017)	Bedrock	VID03C-B	43.8002	5.125	548		3	2.55	1	0	1170000	0	153	8	2000	0	0	0	0	0	0	0	56.851	0	0	0	0	44.9123	7.3	0	0	0	0	0	0	0	0	56.851	0	0	7.3						0.1
Thomas et al. (2017)	Clasts	VID04C-A	43.8004	5.127	561		3	2.55	1	0	1377000	0	153	8	2000	0	0	0	0	0	0	0	56.573	0	0	0	0	44.6927	10.44	0	0	0	0	0	0	0	0	56.573	0	0	10.44						0.1
Thomas et al. (2017)	Gravel	BRO1B-G	43.7949	5.0952	127		3	2.55	1	0	384000	0	153	0	2000	0	0	0	0	0	0	0	57.268	0	0	0	0	45.2417	7.93	0	0	0	0	0	0	0	0	57.268	0	0	7.93						0.1
Thomas et al. (2017)	Gravel	ORM01B-G	43.7889	5.1947	342		3	2.55	1	0	709000	0	153	0	2000	0	0	0	0	0	0	0	61.16	0	0	0	0	48.3164	2.2	0	0	0	0	0	0	0	0	61.16	0	0	2.2						0.1
Thomas et al. (2017)	Gravel	ORM02B-G	43.7813	5.1889	274		3	2.55	1	0	407000	0	153	0	2000	0	0	0	0	0	0	0	55.322	0	0	0	0	43.7044	21.7	0	0	0	0	0	0	0	0	55.322	0	0	21.7						0.1
Thomas et al. (2017)	Sand	ORM02B-S	43.7813	5.1889	274		3	2.55	1	0	366000	0	153	0	2000	0	0	0	0	0	0	0	57.546	0	0	0	0	45.4613	18.24	0	0	0	0	0	0	0	0	57.546	0	0	18.24						0.1
Thomas et al. (2017)	Gravel	ORM03B-G	43.7781	5.1999	265		3	2.55	1	0	422000	0	153	0	2000	0	0	0	0	0	0	0	59.353	0	0	0	0	46.8889	23.23	0	0	0	0	0	0	0	0	59.353	0	0	23.23						0.1
Thomas et al. (2017)	Sand	ORM03B-S	43.7781	5.1999	265		3	2.55	1	0	396000	0	153	0	2000	0	0	0	0	0	0	0	56.573	0	0	0	0	44.6927	19.04	0	0	0	0	0	0	0	0	56.573	0	0	19.04						0.1
Thomas et al. (2017)	Gravel	PLBS-1G	43.8103	5.239	343		3	2.55	1	0	453000	0	153	0	2000	0	0	0	0	0	0	0	52.959	0	0	0	0	41.8376	4.22	0	0	0	0	0	0	0	0	52.959	0	0	4.22						0.1
Thomas et al. (2017)	Sand	PLBS-1S	43.8103	5.239	343		3	2.55	1	0	523000	0	153	0	2000	0	0	0	0	0	0	0	53.793	0	0	0	0	42.4965	5.25	0	0	0	0	0	0	0	0	53.793	0	0	5.25						0.1
Thomas et al. (2017)	Sand	PLBS-2S	43.8151	5.2308	266		3	2.55	1	0	453000	0	153	0	2000	0	0	0	0	0	0	0	52.542	0	0	0	0	41.5082	4.16	0	0	0	0	0	0	0	0	52.542	0	0	4.16						0.1
Thomas et al. (2017)	Gravel	PLBS-3G	43.8137	5.2024	288		3	2.55	1	0	264000	0	153	0	2000	0	0	0	0	0	0	0	50.596	0	0	0	0	39.9708	6.91	0	0	0	0	0	0	0	0	50.596	0	0	6.91						0.1
Thomas et al. (2017)	Gravel	PLBS-4G	43.8268	5.156	191		3	2.55	1	0	311000	0	153	0	2000	0	0	0	0	0	0	0	52.403	0	0	0	0	41.3984	5.85	0	0	0	0	0	0	0	0	52.403	0	0	5.85						0.1
Thomas et al. (2017)	Sand	PLS-E1	43.7579	5.2542	187		3	2.55	1	0	377000	0	153	0	2000	0	0	0	0	0	0	0	52.681	0	0	0	0	41.618	14.35	0	0	0	0	0	0	0	0	52.681	0	0	14.35						0.1
Thomas et al. (2017)	Sand	PLS-E2	43.7584	5.2341	150		3	2.55	1	0	323000	0	153	0	2000	0	0	0	0	0	0	0	52.125	0	0	0	0	41.1787	15.16	0	0	0	0	0	0	0	0	52.125	0	0	15.16						0.1
Thomas et al. (2017)	Sand	REC01B-S	43.7904	5.2898	401		0.125	2.55	1	0	331000	0	153	0	2000	0	0	0	0	0	0	0	58.102	0	0	0	0	45.9006	17.23	0	0	0	0	0	0	0	0	58.102	0	0	17.23						0.1
Thomas et al. (2017)	Gravel	REC02B-G	43.7899	5.301	343		1.6	2.55	1	0	323000	0	153	0	2000	0	0	0	0	0	0	0	53.654	0	0	0	0	42.3867	19.7	0	0	0	0	0	0	0	0	53.654	0	0	19.7						0.1
Thomas et al. (2017)	Sand	REC02B-S	43.7899	5.301	343		0.125	2.55	1	0	319000	0	153	0	2000	0	0	0	0	0	0	0	57.963	0	0	0	0	45.7908	22.05	0	0	0	0	0	0	0	0	57.963	0	0	22.05						0.1
Thomas et al. (2017)	Gravel	ROQ01B-G	43.7741	5.1351	149		1.6	2.55	1	0	406000	0	153	0	2000	0	0	0	0	0	0	0	56.017	0	0	0	0	44.2534	8.19	0	0	0	0	0	0	0	0	56.017	0	0	8.19						0.1
Thomas et al. (2017)	Sand	ROQ01B-S	43.7741	5.1351	149		0.125	2.55	1	0	347000	0	153	0	2000	0	0	0	0	0	0	0	55.739	0	0	0	0	44.0338	7.51	0	0	0	0	0	0	0	0	55.739	0	0	7.51						0.1
Thomas et al. (2017)	Gravel	TAP01B-G	43.7794	5.2523	282		1.6	2.55	1	0	488000	0	153	0	2000	0	0	0	0	0	0	0	56.434	0	0	0	0	44.5829	19.43	0	0	0	0	0	0	0	0	56.434	0	0	19.43						0.1
Thomas et al. (2017)	Sand	TAP01B-S	43.7794	5.2523	282		0.125	2.55	1	0	395000	0	153	0	2000	0	0	0	0	0	0	0	57.268	0	0	0	0	45.2417	13.8	0	0	0	0	0	0	0	0	57.268	0	0	13.8						0.1
Thomas et al. (2017)	Gravel	TAP02B-G	43.7656	5.2405	182		1.6	2.55	1	0	491000	0	153	0	2000	0	0	0	0	0	0	0	56.017	0	0	0	0	44.2534	18.54	0	0	0	0	0	0	0	0	56.017	0	0	18.54						0.1
Thomas et al. (2017)	Sand	TAP02B-S	43.7656	5.2405	182		0.125	2.55	1	0	466000	0	153	0	2000	0	0	0	0	0	0	0	55.878	0	0	0	0	44.1436	17.47	0	0	0	0	0	0	0	0	55.878	0	0	17.47						0.1
Thomas et al. (2017)	Sand	VID01B-S	43.816	5.1024	129		0.125	2.55	1	0	410000	0	153	0	2000	0	0	0	0	0	0	0	56.434	0	0	0	0	44.5829	6.22	0	0	0	0	0	0	0	0	56.434	0	0	6.22						0.1
Thomas et al. (2017)	Sand	VID02B-S	43.8152	5.1034	147		0.125	2.55	1	0	330000	0	153	0	2000	0	0	0	0	0	0	0	55.878	0	0	0	0	44.1436	7.89	0	0	0	0	0	0	0	0	55.878	0	0	7.89						0.1
Ryb et al.(2014a)	Bedrock	SQ1	31.7714	35.0818	789		10	2.55	1	0	700000	0	153	0	2000	0	0	0	0.03	0.09	0	12.83	52.45	0.02	0.05	0	0	43.76	45	0.9	0	0.1	1.6	0	0	0.6	0.038	52.7	0	0.007	155						0.1
Ryb et al.(2014a)	Bedrock	SQ2	31.7693	35.0731	701		10	2.55	1	0	1.02e+06	0	153	0	2000	0	0	0	0.03	0.07	0	12.54	30.83	0.03	0.05	0	0	43.31	134.23	1.2	0.1	0.1	0.9	0	0	1.2	0.036	31.2	0	0.018	10						0.1
Ryb et al.(2014a)	Bedrock	SQ3	31.7634	35.0688	415		10	2.55	1	0	890000	0	153	0	2000	0	0	0.03	0.1	0.24	0.01	4.07	32.48	0.01	0.15	0	0	40.72	10.95	2.1	0.3	0.3	2.3	0	0	0.7	0.034	33.2	0	0.002	8						0.1
Ryb et al.(2014a)	Bedrock	SQ4	31.7681	35.0737	649		2	2.55	1	0	670000	0	153	0	2000	0	0	0.02	0.1	0.15	0	3.45	34.2	0.02	0.03	0	0	44.43	4.18	1.2	0.1	0.1	0.4	0	0	1.7	0.016	35.4	0	0.003	177						0.1
Ryb et al.(2014a)	Bedrock	SQ5	31.7652	35.0728	549		2	2.55	1	0	1350000	0	153	0	2000	0	0	0.03	0.12	0.25	0	23.52	36.3	0.02	0.13	0	0	47.58	102.86	3.1	0.2	0.2	2.4	0	0	1.9	0.022	37	0	0	24						0.1
Ryb et al.(2014a)	Bedrock	SQ6a	31.7489	35.0606	625		2	2.55	1	0	1420000	0	153	0	2000	0	0	0	0.05	0.08	0	24.36	31.48	0.02	0.06	0	0	47.31	97.71	1.4	0.1	0.1	1.2	0	0	1	0.037	31.7	0	0.006	68						0.1
Ryb et al.(2014a)	Bedrock	SQ7	31.7505	35.0613	564		5	2.55	1	0	1320000	0	153	0	2000	0	0	0.01	0.06	0.08	0	21.76	32.21	0.03	0.02	0	0	47.52	179.76	1.6	0.1	0.1	0.7	0	0	1.5	0.001	32.5	0	0	42						0.1
Ryb et al.(2014a)	Bedrock	SQ8	31.7513	35.0642	450		2	2.55	1	0	760000	0	153	0	2000	0	0	0.04	0.11	0.28	0.02	16.27	34.64	0.06	0.15	0	0	47.38	163.71	11.9	0.3	0.3	1.1	0	0	4	0	36.8	0	0.048	4						0.1
Ryb et al.(2014a)	Bedrock	SQ9	31.7516	35.0652	406		2	2.55	1	0	910000	0	153	0	2000	0	0	0	0.04	0.09	0	22.11	33.18	0.03	0.05	0	0	47.14	49.8	2.3	0.2	0.2	2.4	0	0	1.3	0	33.4	0	0.001	6						0.1
Ryb et al.(2014a)	Bedrock	SQ10	31.7355	35.1756	770		5	2.55	1	0	2260000	0	153	0	2000	0	0	0	0.02	0.04	0	23.25	55.7	0.04	0	0	0	47.43	97.17	3.3	0	0	2.8	0	0	0.9	0	55.7	0	0	2						0.1
Ryb et al.(2014a)	Bedrock	SQ11	31.7358	35.1738	733		3	2.55	1	0	1350000	0	153	0	2000	0	0	0.01	0.07	0.16	0	21.51	54.98	0.04	0.08	0	0	46.77	77.62	7.1	0.1	0.1	1.3	0	0	1.9	0	55.7	0	0	13						0.1
Ryb et al.(2014a)	Bedrock	SQ12	31.7355	35.1731	713		3	2.55	1	0	1630000	0	153	0	2000	0	0	0	0.05	0.26	0	24.5	37.67	0.05	0.04	0	0	47.3	91.28	7.8	0.1	0.1	1.1	0	0	2.2	0	38	0	0.186	162						0.1
Ryb et al.(2014a)	Bedrock	SQ13	31.7364	35.171	657		2	2.55	1	0	2050000	0	153	0	2000	0	0	0	0.03	0.09	0	0.31	31.52	0.01	0	0	0	44.01	10.2	1	0	0	0.9	0	0	0.3	0	31.6	0	0.003	59						0.1
Ryb et al.(2014a)	Bedrock	SQ14	31.7369	35.1705	641		5	2.55	1	0	1220000	0	153	0	2000	0	0	0	0.01	0.08	0	0.34	31.27	0.01	0	0	0	44.02	13.33	0.5	0.1	0.1	1.2	0	0	0.2	0	31.3	0	0.006	19						0.1
Ryb et al.(2014a)	Bedrock	SQ15	31.8126	35.1617	788		5	2.55	1	0	1170000	0	153	0	2000	0	0	0.01	0.06	0.36	0.01	19.27	30.58	0.04	0.09	0	0	46.52	94.61	9.7	0.1	0.1	1	0	0	1.9	0	31	0	0.02	9						0.1
Ryb et al.(2014a)	Bedrock	SQ16	31.8115	35.163	748		2	2.55	1	0	1150000	0	153	0	2000	0	0	0	0.06	0.07	0	24.34	33.66	0.02	0.02	0	0	47.56	66.73	1.9	0.1	0.1	1.1	0	0	1.3	0	33.8	0	0.013	6						0.1
Ryb et al.(2014a)	Bedrock	SQ17	31.811	35.1649	703		2	2.55	1	0	850000	0	153	0	2000	0	0	0.02	0.1	0.18	0	22.15	29.42	0.02	0.07	0	0	47.6	87.84	13	0.2	0.1	1.1	0	0	3	0	30.1	0	0.034	3						0.1
Ryb et al.(2014a)	Bedrock	SQ18	31.8106	35.1674	660		2	2.55	1	0	1080000	0	153	0	2000	0	0	0.01	0.04	0.18	0.01	17.67	50.54	0.02	0.04	0	0	47.63	112.43	4.3	0.1	0.1	0.9	0	0	2	0.002	51.4	0.001	0.068	71						0.1
Ryb et al.(2014a)	Bedrock	SQ19	31.8099	35.1684	609		2	2.55	1	0	830000	0	153	0	2000	0	0	0.01	0.07	0.2	0	20.49	42.7	0.03	0.11	0	0	47.23	30.5	4.1	0.2	0.2	2.6	0	0	1.4	0.04	43.3	0	0.069	2						0.1
Ryb et al.(2014a)	Bedrock	UB1	31.7708	35.1974	765		2	2.55	1	0	1300000	0	153	0	2000	0	0	0	0.06	0.08	0	23.25	32.71	0.04	0.03	0	0	47.37	58.9	2.1	0	0.1	3.4	0	0	2.1	0.02	32.8	0	0.004	4						0.1
Ryb et al.(2014a)	Soil-covered bedrock	UB2	31.7708	35.1974	765		2	2.55	1	0	790000	0	153	84	2000	0	0	0	0.04	0.07	0	0.62	55.24	0	0.02	0	0	44.07	1.65	0.7	0.1	0.2	0.2	0	0	0.7	0.012	55.3	0	0.004	90						0.1
Ryb et al.(2014a)	Bedrock	UB3	31.7709	35.0542	727		2	2.55	1	0	1520000	0	153	0	2000	0	0	0.01	0.11	0.13	0	25.43	30.33	0.03	0.08	0	0	47.68	152.92	2.4	0.1	0.1	1.4	0	0	2.7	0.022	30.7	0	0.011	174						0.1
Ryb et al.(2014a)	Soil-covered bedrock	UB4	31.7709	35.0542	727		3	2.55	1	0	1260000	0	153	56	2000	0	0	0.01	0.06	0.06	0	26.17	30.81	0.03	0.05	0	0	47.63	175.56	1.3	0.1	0.1	1	0	0	2.2	0.003	31.1	0	0	103						0.1
Ryb et al.(2014a)	Exposed bedrock/interfluve	UB5	31.7814	35.1451	699		2	2.55	1	0	410000	0	153	0	2000	0	0	0	0.02	0.05	0	13.18	41.9	0.01	0.01	0	0	46.03	4.95	0.8	0	0	1.2	0	0	0.2	0.007	42	0	0	111						0.1
Ryb et al.(2014a)	Exposed bedrock/interfluve	UB7	31.7632	35.022	344		4	2.55	1	0	1100000	0	153	0	2000	0	0	0.01	0.07	0.11	0	0.41	54	0.01	0.01	0	0	44.03	7.47	0.5	0.1	0.2	0.4	0	0	0.3	0	55.7	0	0.001	106						0.1
Ryb et al.(2014a)	Soil-covered bedrock	UB8	31.7632	35.022	344		2	2.55	1	0	670000	0	153	105	2000	0	0	0.03	0.08	0.17	0	0.38	52.08	0.02	0.01	0	0	44.03	15.41	0.7	0.6	0.6	0.4	0	0	0.6	0	55.6	0	0.007	50						0.1
Ryb et al.(2014a)	Exposed bedrock/interfluve	UB9	31.7656	35.0268	475		2	2.55	1	0	1220000	0	153	0	2000	0	0	0	0.05	0.08	0	2.22	53.32	0.03	0.02	0	0	44.32	6.45	0.6	0	0	0.8	0	0	0.7	0.007	53.6	0	0.004	11						0.1
Ryb et al.(2014a)	Soil-covered bedrock	UB10	31.7656	35.0268	475		2	2.55	1	0	970000	0	153	84	2000	0	0	0.01	0.06	0.09	0	0.63	54.96	0.02	0.01	0	0	44.07	2.99	0.5	0.1	0.2	0.4	0	0	0.4	0	55.3	0	0.004	114						0.1
Ryb et al.(2014a)	Exposed bedrock/interfluve	UB11	31.767	35.0364	543		2	2.55	1	0	1150000	0	153	0	2000	0	0	0.01	0.08	0.19	0.01	3.15	51.87	0.01	0.03	0	0	44.49	3.73	1.3	0.1	0.2	1.1	0	0	0.5	0	52.5	0	0.008	45						0.1
Ryb et al.(2014a)	Soil-covered bedrock	UB12	31.767	35.0364	543		5	2.55	1	0	460000	0	153	210	2000	0	0	0.01	0.09	0.12	0	0.35	54.59	0.01	0.04	0	0	44.02	2.19	1.4	0.3	0.3	0.6	0	0	0.6	0	55.7	0	0.004	79						0.1
Ryb et al.(2014a)	Exposed bedrock/interfluve	UB13	31.7514	35.0418	654		2	2.55	1	0	1510000	0	153	0	2000	0	0	0.01	0.07	0.1	0	2.91	52.59	0.02	0.02	0	0	44.42	10.26	0.6	0.1	0.1	0.3	0	0	0.8	0	52.9	0	0.002	105						0.1
Ryb et al.(2014a)	Soil-covered bedrock	UB14	31.7514	35.0418	654		2	2.55	1	0	410000	0	153	98	2000	0	0	0.03	0.2	0.3	0.01	0.55	53.5	0.02	0.04	0	0	44.05	2.71	1.4	0.6	0.6	0.4	0	0	1	0	55.4	0	0.021	97						0.1
Ryb et al.(2014a)	Exposed bedrock/interfluve	UB15	31.7252	35.0141	361		2	2.55	1	0	1340000	0	153	0	2000	0	0	0	0.03	0.06	0	0.21	55.72	0.01	0.01	0	0	44	5.79	0.2	0	0	0.4	0	0	0.1	0	55.8	0	0	99						0.1
Ryb et al.(2014a)	Soil-covered bedrock	UB16	31.7252	35.0141	361		3	2.55	1	0	700000	0	153	70	2000	0	0	0	0.02	0.06	0	0.28	55.67	0.01	0.01	0	0	44.01	9.08	0	0.1	0.1	0.6	0	0	0.1	0.002	55.7	0	0	96						0.1
Ryb et al.(2014a)	Exposed bedrock/interfluve	UB17	31.7242	35.0198	451		3	2.55	1	0	1300000	0	153	0	2000	0	0	0.01	0.04	0.12	0	13.44	41.41	0.02	0.05	0	0	46.04	18.83	1.4	0.1	0.1	2	0	0	1.1	0.022	41.8	0	0.026	105						0.1
Ryb et al.(2014a)	Soil-covered bedrock	UB18	31.7242	35.0198	451		2	2.55	1	0	640000	0	153	0	2000	0	0	0.04	0.19	0.25	0.01	12.17	42.19	0.04	0.12	0	0	45.74	40.68	4.2	0.7	0.8	1.8	0	0	2.2	0.038	43.8	0	0.025	467						0.1
Ryb et al.(2014a)	Exposed bedrock/interfluve	UB19	31.7238	35.0235	515		2	2.55	1	0	1570000	0	153	0	2000	0	0	0	0.06	0.07	0	19.64	35.94	0.06	0.04	0	0	46.89	67.41	4.2	0.1	0.1	2.4	0	0	1.8	0.013	36.1	0	0.012	93						0.1
Ryb et al.(2014a)	Soil-covered bedrock	UB20	31.7238	35.0235	515		2	2.55	1	0	940000	0	153	28	2000	0	0	0.01	0.06	0.09	0	21.12	34.13	0.06	0.06	0	0	47.13	70.23	4.7	0.1	0.1	2.7	0	0	1.7	0.025	34.4	0	0.01	31						0.1
Ryb et al.(2014a)	Exposed bedrock/interfluve	UB21	31.7262	35.0515	614		2	2.55	1	0	1270000	0	153	0	2000	0	0	0	0.03	0.07	0	15.17	39.5	0.02	0.04	0	0	46.37	23.81	0.9	0.1	0.1	2.2	0	0	0.7	0.026	39.6	0	0.011	136						0.1
Ryb et al.(2014a)	Soil-covered bedrock	UB22	31.7262	35.0515	614		3	2.55	1	0	470000	0	153	98	2000	0	0	0.01	0.06	0.1	0	8.64	46.37	0.01	0.07	0	0	45.31	13.03	1.1	0.2	0.2	1.5	0	0	0.5	0.037	46.7	0	0.011	92						0.1
Ryb et al.(2014a)	Exposed bedrock/interfluve	UB23	31.726	35.1562	846		3	2.55	1	0	1.64e+06	0	153	0	2000	0	0	0.01	0.1	0.14	0	21.47	32.92	0.07	0.09	0	0	47.26	159.79	5.5	0.2	0.1	4.5	0	0	1.6	0.033	33.5	0	0.017	181						0.1
Ryb et al.(2014a)	Soil-covered bedrock	UB24	31.726	35.1562	846		3	2.55	1	0	540000	0	153	91	2000	0	0	0.01	0.06	0.15	0	6.17	50.25	0.01	0.07	0	0	44.72	14.27	2.2	0.1	0.2	1.1	0	0	0.7	0.022	50.8	0	0.001	10						0.1
Ryb et al.(2014a)	Exposed bedrock/interfluve	UB25	31.718	35.1219	787		5	2.55	1	0	1950000	0	153	0	2000	0	0	0	0.04	0.06	0	21.43	36.4	0.06	0.03	0	0	46.83	110.57	4	0.1	0.1	3	0	0	1.2	0.018	36.5	0	0.006	14						0.1
Ryb et al.(2014a)	Soil-covered bedrock	UB26	31.718	35.1219	787		3	2.55	1	0	660000	0	153	77	2000	0	0	0	0.03	0.07	0	19.03	37.07	0.05	0.04	0	0	46.72	105.99	4.4	0.2	0.2	2.8	0	0	0.9	0.022	37.2	0	0.008	13						0.1
Ryb et al.(2014a)	Sediment	SQSED1	31.7369	35.1705	793		1	2.55	1	0	540000	0	153	0	2000	0	0	0.02	0.13	0.45	0.01	5.54	39.5	0.02	0.16	0	0	44.61	22.94	1.9	1.2	1.2	0.8	0	0	1.7	0.033	41.1	0	0.035	18						0.1
Ryb et al.(2014a)	Sediment	SQSED2	31.7907	35.1656	748		1	2.55	1	0	480000	0	153	0	2000	0	0	0.02	0.17	0.36	0.02	13.49	38.16	0.02	0.12	0	0	45.78	42.11	3.3	0.7	0.7	1.3	0	0	2	0.026	40.7	0	0.096	57						0.1
Ryb et al.(2014a)	Sediment	SQSED3	31.7598	35.0954	660		1	2.55	1	0	500000	0	153	0	2000	0	0	0.03	0.14	0.28	0.01	19.38	48.35	0.02	0.14	0	0	46.24	53.77	2.7	1	1.1	1	0	0	2.5	0.037	51	0	0.019	51						0.1
Ryb et al.(2014a)	Sediment	SQSED4	31.746	35.0726	659		1	2.55	1	0	230000	0	153	0	2000	0	0	0.04	0.23	0.35	0.01	14.16	49.48	0.02	0.16	0	0	46.12	48.27	3.6	1.1	1.1	0.7	0	0	2.2	0.045	52.2	0	0.021	24						0.1
Ryb et al.(2014a)	Sediment	SQSED5	31.7611	35.0236	707		1	2.55	1	0	500000	0	153	0	2000	0	0	0.02	0.16	0.34	0.01	17.19	38.44	0.02	0.11	0	0	46.16	59.19	3.2	0.5	0.5	1.3	0	0	2.4	0.026	40.7	0	0.096	45						0.1
Ryb et al.(2014a)	Sediment	SQSED6	31.7266	35.0142	577		1	2.55	1	0	520000	0	153	0	2000	0	0	0.02	0.23	0.26	0.01	4.68	49.55	0.02	0.1	0	0	44.68	17.69	1.6	0.8	0.8	0.8	0	0	1.4	0.037	51	0	0.019	63						0.1
Ryb et al.(2014a)	Sediment	SQSED7	31.8104	35.2062	761		1	2.55	1	0	540000	0	153	0	2000	0	0	0.01	0.09	0.3	0.01	3.38	47.08	0.01	0.1	0	0	44.49	16.22	1.9	1.1	1.2	1.2	0	0	1.2	0.045	52.2	0	0.021	18						0.1
Ryb et al. (2014b)	Bedrock/hillslope	AR1	31.6376	35.1366	947		3	2.55	1	0	1450000	0	153	0	2000	0	0	0.00651063	0.0730415	0.0280997	0.00196203	17.9869	34.5467	0.0542967	0.025652	0	0	46.7531	77.3555	0.892227	0.0720839	0.0714546	1.9152	0	0.739369	3.49891	0.00254003	34.7928	0.000615903	0.00698175	75.7274						0.1
Ryb et al. (2014b)	Bedrock/hillslope	AR2	31.6382	35.1363	960		3	2.55	1	0	2590000	0	153	0	2000	0	0	0.000311351	0.0154964	0.00134984	0.00174124	17.9044	35.041	0.0418479	0.000220603	0	0	47.051	100.074	0	0.000308845	0.000313724	0.837461	0	0.310894	0.638846	0	35.0419	0.000267771	0.00097795	99.185						0.1
Ryb et al. (2014b)	Bedrock/hillslope	AR4	31.6377	35.1354	948		3	2.55	1	0	2330000	0	153	0	2000	0	0	0.00165928	0.0364754	0.0186588	0.00135518	16.7777	36.3385	0.0279935	0.00436505	0	0	46.839	58.6579	0.160651	0.0725206	0.143792	2.51071	0	2.29352	0.442546	0	36.3548	0.000323908	0.00320194	58.0496						0.1
Ryb et al. (2014b)	Bedrock/hillslope	AR5	31.6375	35.1342	921		2.5	2.55	1	0	2000000	0	153	0	2000	0	0	0.00600066	0.0852176	0.0460125	0.00159924	17.9922	34.5921	0.049751	0.0214249	0	0	46.7946	74.562	0.740334	0.0831422	0.0817696	0.893159	0	0.525357	1.49624	0.00308337	34.8135	0.000442756	0.00698555	73.3955						0.1
Ryb et al. (2014b)	Bedrock/hillslope	AR6	31.6365	35.1327	888		2	2.55	1	0	1070000	0	153	0	2000	0	0	0.000283016	0.0118411	0.00793528	0.00180634	16.7868	36.3473	0.0154735	0.000732223	0	0	46.8559	25.4268	0.000403641	0.000305611	0.000311641	1.72458	0	0.0497178	0.395387	0	36.35	0.000117575	0.00295912	25.2049						0.1
Ryb et al. (2014b)	Bedrock/interfluve	AR7	31.6476	35.1817	865		3.5	2.55	1	0	2260000	0	153	0	2000	0	0	0.000896435	0.0154044	0.0119868	0.00110233	0.171407	55.7162	0.00274809	0.0025947	0	0	43.9137	3.61076	0.073544	0.0938862	0.0940627	0.00752522	0	0.14473	0.0654356	0	55.8272	8.94994e-06	0.00276478	3.65375						0.1
Ryb et al. (2014b)	Bedrock/interfluve	AR9	31.6034	35.2151	819		6	2.55	1	0	2520000	0	153	0	2000	0	0	0.00306431	0.031053	0.0205143	0.00133725	1.03102	54.5674	0.0178024	0.00553115	0	0	43.9507	5.93277	0.179508	0.0714725	0.0718159	0.21005	0	0.397182	0.312797	0	54.8128	0.000126675	0.0060928	5.8375						0.1
Ryb et al. (2014b)	Bedrock/hillslope	AR11	31.605	35.211	626		5.5	2.55	1	0	1210000	0	153	0	2000	0	0	0.00390342	0.0628938	0.0559469	0.00230554	16.9828	35.7453	0.090704	0.020768	0	0	46.5974	134.813	0.468991	0.0583804	0.0590856	0.762087	0	0.770273	4.66699	0.00468449	35.985	0.000342277	0.0133317	132.043						0.1
Ryb et al. (2014b)	Bedrock/hillslope	AR12	31.6048	35.2116	664		2.5	2.55	1	0	3360000	0	153	0	2000	0	0	0.00193402	0.0319585	0.0101509	0.00243024	16.1279	37.0264	0.108876	0.0718129	0	0	46.6693	113.527	0.181333	0.0702558	0.0708972	1.72558	0	0.754877	0.566284	0.0651483	37.0903	0.000304301	0.00530372	112.775						0.1
Ryb et al. (2014b)	Bedrock/hillslope	AR13	31.6046	35.2121	710		2.5	2.55	1	0	2300000	0	153	0	2000	0	0	0.00574757	0.0659438	0.0184971	0.00276746	18.7227	33.7102	0.0564743	0.0506607	0	0	46.9001	33.9876	0.860243	0.0634343	0.0641099	2.34437	0	1.28	0.384875	0.0299015	33.9262	0.000659485	0.00560062	33.4317						0.1
Ryb et al. (2014b)	Bedrock/hillslope	AR14	31.6041	35.2135	762		2.5	2.55	1	0	1650000	0	153	0	2000	0	0	0.00913265	0.131197	0.0991579	0.0045411	17.3638	35.2773	0.0213303	0.0495044	0	0	46.6461	38.0176	1.30946	0.0899015	0.0896652	2.52878	0	2.11033	0.875728	0.0030698	35.5323	0.000678307	0.0093598	37.0983						0.1
Ryb et al. (2014b)	Bedrock/hillslope	AR15	31.6039	35.2143	795		2	2.55	1	0	1.99e+06	0	153	0	2000	0	0	0.000488741	0.0104863	0.0160939	0.00161757	0.306565	55.6667	0.00469096	0.00224429	0	0	44.0224	8.80891	0.041849	0.0426572	0.043457	0.566702	0	0	0.087855	0.000123905	55.6708	3.53968e-05	0.00414746	8.76074						0.1
Ryb et al. (2014b)	Bedrock/interfluve	AR16	31.6021	35.226	769		3	2.55	1	0	5810000	0	153	0	2000	0	0	9.13089e-05	0.00370076	0.00123549	0.000717743	0.287625	55.3394	0.00802623	0.000474211	0	0	43.7449	11.5309	0.049516	0.000318154	0.000324211	0.811946	0	1.34154	0.0575465	0	55.6896	0	0.00076012	11.0365						0.1
Ryb et al. (2014b)	Bedrock/interfluve	AR18	31.5864	35.2283	717		4.5	2.55	1	0	2940000	0	153	0	2000	0	0	0.00018976	0.0039605	0.00219594	0.000345851	0.200555	55.7907	9.61647e-05	0.000422273	0	0	44.004	5.53786	0.0125653	0.000301586	0.000306103	0.0659173	0	1.42256	0.0710459	0	55.7934	0	0.000797473	5.50285						0.1
Ryb et al. (2014b)	Bedrock/interfluve	AR19	31.5836	35.1998	874		3	2.55	1	0	2510000	0	153	0	2000	0	0	0.00234869	0.0240275	0.0295285	0.00148781	0.205038	55.4495	0.00120282	0.0052174	0	0	43.7411	3.45944	0.184417	0.0709709	0.0729106	0.0466647	0	1.16548	0.126718	8.41539e-05	55.7869	3.38353e-05	0.00312719	3.36841						0.1
Ryb et al. (2014b)	Bedrock/interfluve	AR21	31.5817	35.2057	837		4.5	2.55	1	0	4.18e+06	0	153	0	2000	0	0	0.0053945	0.0495813	0.0488211	0.00122597	0.219083	55.0962	0.00240474	0.0175045	0	0	43.4792	3.20959	0.665898	0.0526853	0.0541749	0.132036	0	1.83869	0.412356	0.00201246	55.774	8.27183e-05	0.0036278	3.13396						0.1
Ryb et al. (2014b)	Bedrock/interfluve	AR23	31.577	35.2158	776		2	2.55	1	0	3760000	0	153	0	2000	0	0	0.00131106	0.0141222	0.00944821	0.00098586	0.189637	55.7274	0.00103414	0.00402608	0	0	43.9424	5.07527	0.205176	0.000942563	0.000631406	0.0101595	0	0.189103	0.159622	0	55.8067	0	0.00106704	5.03356						0.1
Ryb et al. (2014b)	Bedrock/interfluve	AR24	31.5702	35.2201	711		5	2.55	1	0	3.22e+06	0	153	0	2000	0	0	0.00343176	0.020863	0.0114589	0.0010102	0.274357	55.4039	0.00321868	0.00617579	0	0	43.781	7.11904	0.276312	0.00119454	0.0639585	0.247866	0	1.23471	0.0926452	-1.91744e-05	55.708	5.91832e-05	0.00184155	7.03397						0.1
Ryb et al. (2014b)	Bedrock/interfluve	AR25	31.5569	35.2261	606		2	2.55	1	0	3140000	0	153	0	2000	0	0	0.0102459	0.113761	0.0889393	0.000895274	0.278189	54.9288	0.0320103	0.017492	0	0	43.4123	15.6558	0.897037	0.405614	0.421532	2.22903	0	15.0247	0.742212	0.00181728	55.6995	0.000199007	0.00804791	15.283						0.1
Ryb et al. (2014b)	Bedrock/hillslope	AR26	31.5567	35.2247	560		2	2.55	1	0	1700000	0	153	0	2000	0	0	0.00167328	0.0179899	0.0129959	0.00196562	0.298711	55.3691	0.00393544	0.00475101	0	0	43.7803	7.25058	0.147907	0.117328	0.121933	0.0239543	0	0.236106	0.0966179	0.00103494	55.6792	0	0.00170869	7.14667						0.1
Ryb et al. (2014b)	Bedrock/hillslope	AR27	31.5564	35.2241	544		2	2.55	1	0	2280000	0	153	0	2000	0	0	0.000566519	0.00890811	0.0141293	0.00162533	0.328319	55.6228	0.00714673	0.00229458	0	0	44.0117	10.0403	0.0804585	0.0402958	0.0417437	0.777227	0	0.195563	0.244226	0.000101053	55.6422	1.78665e-05	0.00334617	9.97607						0.1
Ryb et al. (2014b)	Bedrock/hillslope	AR28	31.5562	35.2237	513		2.5	2.55	1	0	1300000	0	153	0	2000	0	0	0.0131293	0.0926713	0.0861427	0.00414859	17.066	35.2127	0.0277316	0.0370517	0	0	46.2703	32.0224	1.33264	0.132631	0.137255	2.25268	0	2.45916	0.62101	0.00268197	35.7319	0.000485347	0.00869185	31.2394						0.1
Ryb et al. (2014b)	Bedrock/interfluve	AR30	31.5533	35.2331	501		1	2.55	1	0	2840000	0	153	0	2000	0	0	0.0132797	0.0999976	0.0919878	0.00907182	18.2444	33.623	0.0180963	0.0489437	0	0	46.3094	10.4396	1.84725	0.213364	0.214908	1.02922	0	0.843214	2.1818	0.00213842	55.6637	0.000103395	0.00542799	10.0987						0.1
Ryb et al. (2014b)	Bedrock/interfluve	AR31	31.4644	35.3771	182		3.5	2.55	1	0	4900000	0	153	0	2000	0	0	0.00859871	0.0777012	0.0510326	0.000785225	0.307648	54.972	0.0175438	0.0231982	0	0	43.4784	96.047	0.781706	0.205325	0.356595	2.15761	0	20.9918	0.479263	0.0026856	34.7223	0.000159558	0.00910612	94.8638						0.1
Ryb et al. (2014b)	Bedrock/interfluve	AR32	31.4648	35.3765	172		6	2.55	1	0	3.97e+06	0	153	0	2000	0	0	0.00235508	0.0442262	0.0246794	0.00185937	18.1001	34.5793	0.020273	0.0185236	0	0	46.9024	51.9846	0.374225	0.0373476	0.0387711	1.36515	0	2.90868	0.131849	0.000539497	53.2565	0.000189182	0.0130645	51.5561						0.1
Ryb et al. (2014b)	Bedrock/interfluve	AR33	31.465	35.3766	173		8	2.55	1	0	3460000	0	153	0	2000	0	0	0.00185597	0.0272406	0.0218495	0.00134868	2.35269	53.0806	0.0195009	0.0100533	0	0	44.2271	50.3415	0.244066	0.0665609	0.0688555	1.21236	0	3.73643	0.938825	0.00328052	34.9315	0.000421027	0.0317817	49.6685						0.1
Ryb et al. (2014b)	Bedrock/interfluve	AR38	31.4436	35.3661	218		2	2.55	1	0	4360000	0	153	0	2000	0	0	0.00536288	0.053779	0.0427834	0.00745163	17.8385	34.6498	0.0324549	0.0226699	0	0	46.672	41.806	0.611426	0.239146	0.309885	3.94577	0	16.6584	1.06111	0.00103712	34.2333	0.000207744	0.00805929	41.5299						0.1
Ryb et al. (2014b)	Bedrock/interfluve	AR39	31.4443	35.3659	210		5.5	2.55	1	0	6430000	0	153	0	2000	0	0	0.00181328	0.0254882	0.0185104	0.00535501	18.5514	34.1576	0.0130507	0.0103137	0	0	47.0642	28.6587	0.20104	0.112574	0.116006	0.580825	0	3.64431	0.391127	0.00148064	55.5012	0.00017751	0.00764103	28.1767						0.1
Ryb et al. (2014b)	Bedrock/interfluve	AR40	31.4719	35.2918	338		5.5	2.55	1	0	1.96e+06	0	153	0	2000	0	0	0.00594699	0.0520654	0.0805491	0.00246937	0.451525	54.9699	0.00964109	0.0127645	0	0	43.6338	39.9241	0.61297	0.0756857	0.116001	1.1628	0	5.8972	0.329049	0.00660752	55.6454	0.000162004	0.00502347	38.6784						0.1
Ryb et al. (2014b)	Bedrock/interfluve	AR41	31.4826	35.3107	319		5	2.55	1	0	4670000	0	153	0	2000	0	0	0.0133571	0.0994532	0.0449506	0.00080017	0.321964	54.8587	0.03178	0.0395591	0	0	43.4051	21.4021	1.49433	0.404215	0.454752	2.23216	0	40.7129	1.25315	0.00210784	55.6465	9.69285e-05	0.00201206	21.1953						0.1
Ryb et al. (2014b)	Bedrock/hillslope	AR42	31.4823	35.3114	284		3	2.55	1	0	1220000	0	153	0	2000	0	0	0.00126218	0.0152043	0.0126343	0.0126694	0.326243	55.5155	0.0131216	0.00589613	0	0	43.9252	32.8448	0.124513	0.030575	0.0314671	0.695201	0	3.35814	0.0755257	0.00128052	55.6031	4.95779e-05	0.00281961	32.1734						0.1
Ryb et al. (2014b)	Bedrock/hillslope	AR43	31.4824	35.3118	241		2	2.55	1	0	610000	0	153	0	2000	0	0	0.00439564	0.0575477	0.0317392	0.0022136	0.362258	55.2575	0.00963604	0.0185139	0	0	43.7621	9.43209	0.538443	0.0700701	0.0719882	0.328923	0	2.25326	0.370684	0.0012402	55.6154	3.2063e-05	0.00418307	9.27103						0.1
Ryb et al. (2014b)	Bedrock/hillslope	AR44	31.4825	35.3122	220		2	2.55	1	0	950000	0	153	0	2000	0	0	0.00651155	0.08691	0.0532945	0.00452446	0.347721	55.0135	0.0030547	0.0191626	0	0	43.5548	15.2751	0.679176	0.329903	0.33803	0.110406	0	0.985391	0.382548	0.00159388	55.6252	3.41502e-05	0.00597726	15.0973						0.1
Ryb et al. (2014b)	Bedrock/hillslope	AR45	31.4827	35.3125	200		0.5	2.55	1	0	660000	0	153	0	2000	0	0	0.00191999	0.0355794	0.0336921	0.00209542	0.340917	55.337	0.0049531	0.0168878	0	0	43.8012	69.9795	0.387086	0.232633	0.203741	0.658007	0	0.86526	0.18797	0.00840598	34.9097	0.000723118	0.0203978	68.0821						0.1
Ryb et al. (2014b)	Sediment	ARSED1	31.6055	35.2111	616		2	2.55	1	0	1420000	0	153	0	2000	0	0	0.0167552	0.145876	0.129071	0.00443456	17.6507	34.2109	0.041776	0.0767187	0	0	46.1225	19.2291	2.48893	0.191339	0.233313	2.40265	0	6.96575	1.66767	0.00376892	49.6588	0.000332366	0.0166443	18.6588						0.1
Ryb et al. (2014b)	Sediment	ARSED2	31.5563	35.2235	501		2	2.55	1	0	1500000	0	153	0	2000	0	0	0.0152247	0.13952	0.102226	0.00726578	5.32662	48.6651	0.0139025	0.031307	0	0	44.0091	17.1548	0.901569	0.611046	0.622526	0.715723	0	3.2033	1.03612	0.00409009	52.4876	0.00028213	0.0186196	16.5727						0.1
Ryb et al. (2014b)	Sediment	ARSED3	31.476	35.3636	180		2	2.55	1	0	1080000	0	153	0	2000	0	0	0.0125228	0.106429	0.0944364	0.00474998	2.96418	51.4794	0.0141719	0.028091	0	0	43.6382	51.5525	0.842186	0.623195	0.666507	0.794025	0	5.80554	0.874711	0.00677169	55.1384	0.00104527	0.0390478	23.8751						0.1
Ryb et al. (2014b)	Sediment	ARSED4	31.4778	35.313	183		2	2.55	1	0	1360000	0	153	0	2000	0	0	0.00154198	0.0648641	0.040949	0.00173858	0.72719	54.1313	0.0208178	0.00792051	0	0	43.2768	30.3289	0.171976	0.394448	0.467313	3.70841	0	21.274	0.318763	0.0163111	54.8276	0.00130012	0.0381271	16.5929						0.1
Ryb et al. (2014b)	Sediment	ARSED5	31.4619	35.3555	-196		2	2.55	1	0	1260000	0	153	0	2000	0	0	0.00188223	0.0477407	0.0403942	0.0034631	0.980258	53.8254	0.0187225	0.0171482	0	0	43.313	29.8452	0.222422	0.397808	0.516626	1.60894	0	14.796	0.59893	0.00423754	52.7779	0.000525269	0.068386	20.1013						0.1
Matsushi et al. (2010)	Bedrock	Nt-2A	44.989	142.336	133		3.5	2.55	1	0	400000	0	153	0	2000	0	11.9069	0	0	0	0	0	45.6058	0	0.353985	0	0	36.0286	27.97	12.9935	1.08886	1.16657	0	0	0	0	0.353985	45.6058	0	0	27.97						0.1
Matsushi et al. (2010)	Bedrock	Nt-3.2A	44.989	142.331	104		3.5	2.55	1	0	860000	0	153	0	2000	0	4.389	0	0	0	0	0	50.1966	0	0.115373	0	0	39.6553	28.63	5.85669	0.853438	0.755847	0	0	0	0	0.115373	50.1966	0	0	28.63						0.1
Matsushi et al. (2010)	Bedrock	Sb-1A	44.0923	142.578	611		3.5	2.55	1	0	1080000	0	153	0	2000	0	0	0	0	0	0	0	55.4212	0		0	0	43.7827	10.68	0	0	0.128716	0	0	0	0	0	55.4212	0	0	10.68						0.1
Matsushi et al. (2010)	Bedrock	Sb-3.2A	44.0922	142.574	524		3.5	2.55	1	0	470000	0	153	0	2000	0	9.47147	0.435222	2.2695	1.65919	0	0	43.5527	0	0.240841	0	0	34.4066	7.8	3.9967	1.56961	2.00854	0	0	0	0	0.240841	43.5527	0.435222	1.65919	7.8						0.1
Matsushi et al. (2010)	Bedrock	Iz-3A	39.9321	141.744	778		3.5	2.55	1	0	810000	0	153	0	2000	0	18.5064	0	0	0	0	0	44.0025	0	0	0	0	34.762	6.47	1.52926	0.759436	0.607502	0	0	0	0	0	44.0025	0	0	6.47						0.1
Matsushi et al. (2010)	Bedrock	Iz-5A	40.0657	141.709	490		3.5	2.55	1	0	760000	0	153	0	2000	0	1.88242	0	0	0	0	0	49.9	0	0	0	0	39.421	17.99	4.53806	1.41063	1.19818	0	0	0	0	0	49.9	0	0	17.99						0.1
Matsushi et al. (2010)	Bedrock	Tn-2A	39.1781	141.576	594		3.5	2.55	1	0	850000	0	153	0	2000	0	0	0	0	0	0	0	55.7804	0	0	0	0	44.0666	2.78	0	0.436355	0	0	0	0	0	0	55.7804	0	0	2.78						0.1
Matsushi et al. (2010)	Bedrock	Tn-3A	39.1766	141.577	614		3.5	2.55	1	0	710000	0	153	0	2000	0	0	0	0	0	0	0	54.5935	0	0	0	0	43.1289	4.64	0	0.430634	0.479048	0	0	0	0	0	54.5935	0	0	4.64						0.1
Matsushi et al. (2010)	Bedrock	Ab-2A	37.3581	140.67	851		3.5	2.55	1	0	1520000	0	153	0	2000	0	0	0	0	0	0	0	50.4845	0	0	0	0	39.8828	15.79	2.21971	0	0.134434	0	0	0	0	0	50.4845	0	0	15.79						0.1
Matsushi et al. (2010)	Bedrock	Ab-3A	37.3585	140.67	855		3.5	2.55	1	0	740000	0	153	0	2000	0	0	0	0	0	0	0	53.723	0	0	0	0	42.4412	10.51	0.33428	0	0.217062	0	0	0	0	0	53.723	0	0	10.51						0.1
Matsushi et al. (2010)	Bedrock	Ab-4A	37.3496	140.674	834		3.5	2.55	1	0	1110000	0	153	0	2000	0	0	0	0	0	0	0	54.0287	0	0	0	0	42.6826	11.25	0.756745	0.411976	0	0	0	0	0	0	54.0287	0	0	11.25						0.1
Matsushi et al. (2010)	Bedrock	Ak-1D	34.265	131.306	401		3.5	2.55	1	0	1.03e+06	0	153	0	2000	0	0	0	0	0	0	0	54.5035	0	0	0	0	43.0578	26.33	0.381843	0.304173	0.253406	0	0	0	0	0	54.5035	0	0	26.33						0.1
Matsushi et al. (2010)	Bedrock	Ak-4A	34.2528	131.318	336		3.5	2.55	1	0	640000	0	153	0	2000	0	0	0	0	0	0	0	55.52	0	0	0	0	43.8608	4.27	0.67899	0	0.648256	0	0	0	0	0	55.52	0	0	4.27						0.1
Matsushi et al. (2010)	Bedrock	Hr-3B	33.7644	130.908	487		3.5	2.55	1	0	910000	0	153	0	2000	0	0	0	0	0	0	0	55.4386	0	0	0	0	43.7965	4.21	0	0.371715	0.516095	0	0	0	0	0	55.4386	0	0	4.21						0.1
Matsushi et al. (2010)	Bedrock	Hd-1B	26.8544	128.258	248		3.5	2.55	1	0	370000	0	153	0	2000	0	0	0	0	0	0	0	55.3487	0	0	0	0	43.7255	9.85	0	0	0.190011	0	0	0	0	0	55.3487	0	0	9.85						0.1
Matsushi et al. (2010)	Bedrock	Ym-2B	26.6747	127.917	219		3.5	2.55	1	0	370000	0	153	0	2000	0	0	0	0	0	0	0	54.7734	0	0	0	0	43.271	10.66	0.549867	0	0	0	0	0	0	0	54.7734	0	0	10.66						0.1
Xu et al.(2013)	Bedrock	GZCl-3	26.4012	106.529	1226		3.5	2.55	1	0	793000	0	153	0	2000	0	0	0	0	0.0739744	0.00304728	0	46.843	0.00649716	0.0299945	0	0	37.006	17.5	0	0.156	0.252	1.55	0.183	0	0.721	0.0299945	46.843	0	0.0739744	17.5						0.1
Xu et al.(2013)	Bedrock	GZCl-4	26.4758	106.964	1110		3.5	2.55	1	0	2360000	0	153	0	2000	0	0	0	0	0.113592	0.00268574	0	34.472	0.00974574	0.106728	0	0	27.2329	205.6	0	0.226	0.165	0.284	0.471	0	2.05	0.106728	34.472	0	0.113592	205.6						0.1
Xu et al.(2013)	Bedrock	GZCl-5	26.9742	104.518	2329		3.5	2.55	1	0	2.22e+06	0	153	0	2000	0	0	0	0	0.0534435	0.00526817	0	48.65	0.00308683	0.0344516	0	0	38.4335	16.2	0	0.221	0.285	0.352	0.174	0	0.269	0.0344516	48.65	0	0.0534435	16.2						0.1
Xu et al.(2013)	Bedrock	GZCl-7	26.6977	104.71	1959		3.5	2.55	1	0	1770000	0	153	0	2000	0	0	0	0	0.0233333	0.00282777	0	56.712	0.00683415	0.00795036	0	0	44.8025	46	0	0.0384	0.0857	1.64	0.047	0	0.453	0.00795036	56.712	0	0.0233333	46						0.1
Xu et al.(2013)	Bedrock	GZCl-9	27.8801	108.304	586		3.5	2.55	1	0	1410000	0	153	0	2000	0	0	0	0	0.0212173	0.00308601	0	50.735	0.00148276	0.00096368	0	0	40.0806	21.7	0	0.0884	0.108	0.345	0.0645	0	0.43	0.00096368	50.735	0	0.0212173	21.7						0.1
Xu et al.(2013)	Bedrock	GZCl-10	28.0976	108.322	577		3.5	2.55	1	0	2020000	0	153	0	2000	0	0	0	0	0.102941	0.0155334	0	45.87	0.00616017	0.0690236	0	0	36.2373	94.9	0	0.135	0.179	0.823	0.287	0	1.14	0.0690236	45.87	0	0.102941	94.9						0.1
Godard et al.(2016)	Clasts		43.8059	5.1587	684		3	2.55	1	0	640000	0	153	0	2000	0	0	0	0	0	0	0	43.369	0	0	0	0	34.2615	2	0	0	0	0	0	0	0	0	43.369	0	0	2						0.1
Godard et al.(2016)	Clasts		43.8059	5.1516	706		3	2.55	1	0	850000	0	153	0	2000	0	0	0	0	0	0	0	55.96	0	0	0	0	44.2084	2	0	0	0	0	0	0	0	0	55.96	0	0	2						0.1
Godard et al.(2016)	Bedrock		43.8059	5.1516	706		3	2.55	1	0	820000	0	153	0	2000	0	0	0	0	0	0	0	55.96	0	0	0	0	44.2084	3	0	0	0	0	0	0	0	0	55.96	0	0	3						0.1
Godard et al.(2016)	Clasts		43.8143	5.1421	707		3	2.55	1	0	710000	0	153	0	2000	0	0	0	0	0	0	0	57.359	0	0	0	0	45.3136	2	0	0	0	0	0	0	0	0	57.359	0	0	2						0.1
Godard et al.(2016)	Bedrock		43.8143	5.1421	707		3	2.55	1	0	690000	0	153	0	2000	0	0	0	0	0	0	0	47.566	0	0	0	0	37.5771	2	0	0	0	0	0	0	0	0	47.566	0	0	2						0.1
Godard et al.(2016)	Clasts		43.8163	5.1407	694		3	2.55	1	0	590000	0	153	0	2000	0	0	0	0	0	0	0	36.374	0	0	0	0	28.7355	2	0	0	0	0	0	0	0	0	36.374	0	0	2						0.1
Godard et al.(2016)	Bedrock		43.8163	5.1407	694		3	2.55	1	0	610000	0	153	0	2000	0	0	0	0	0	0	0	41.97	0	0	0	0	33.1563	2	0	0	0	0	0	0	0	0	41.97	0	0	2						0.1
Godard et al.(2016)	Clasts		43.8111	5.1508	672		3	2.55	1	0	660000	0	153	0	2000	0	0	0	0	0	0	0	29.379	0	0	0	0	23.2094	6	0	0	0	0	0	0	0	0	29.379	0	0	6						0.1
Godard et al.(2016)	Bedrock		43.8111	5.1508	672		3	2.55	1	0	690000	0	153	0	2000	0	0	0	0	0	0	0	43.369	0	0	0	0	34.2615	7	0	0	0	0	0	0	0	0	43.369	0	0	7						0.1
Godard et al.(2016)	Clasts		43.814	5.1422	687		3	2.55	1	0	970000	0	153	0	2000	0	0	0	0	0	0	0	41.97	0	0	0	0	33.1563	4	0	0	0	0	0	0	0	0	41.97	0	0	4						0.1
Godard et al.(2016)	Bedrock		43.814	5.1422	687		3	2.55	1	0	920000	0	153	0	2000	0	0	0	0	0	0	0	43.369	0	0	0	0	34.2615	4	0	0	0	0	0	0	0	0	43.369	0	0	4						0.1
Godard et al.(2016)	Clasts		43.8095	5.1768	680		3	2.55	1	0	1010000	0	153	0	2000	0	0	0	0	0	0	0	40.571	0	0	0	0	32.0511	3	0	0	0	0	0	0	0	0	40.571	0	0	3						0.1
Godard et al.(2016)	Bedrock		43.8095	5.1768	680		3	2.55	1	0	1040000	0	153	0	2000	0	0	0	0	0	0	0	48.965	0	0	0	0	38.6824	4	0	0	0	0	0	0	0	0	48.965	0	0	4						0.1
Godard et al.(2016)	Clasts		43.8092	5.1744	622		3	2.55	1	0	630000	0	153	0	2000	0	0	0	0	0	0	0	43.369	0	0	0	0	34.2615	6	0	0	0	0	0	0	0	0	43.369	0	0	6						0.1
Godard et al.(2016)	Bedrock		43.8092	5.1744	622		3	2.55	1	0	650000	0	153	0	2000	0	0	0	0	0	0	0	46.167	0	0	0	0	36.4719	7	0	0	0	0	0	0	0	0	46.167	0	0	7						0.1
Godard et al.(2016)	Clasts		43.8082	5.1724	624		3	2.55	1	0	840000	0	153	0	2000	0	0	0	0	0	0	0	44.768	0	0	0	0	35.3667	3	0	0	0	0	0	0	0	0	44.768	0	0	3						0.1
Godard et al.(2016)	Bedrock		43.8082	5.1724	624		3	2.55	1	0	830000	0	153	0	2000	0	0	0	0	0	0	0	46.167	0	0	0	0	36.4719	3	0	0	0	0	0	0	0	0	46.167	0	0	3						0.1
Godard et al.(2016)	Clasts		43.8091	5.1719	625		3	2.55	1	0	760000	0	153	0	2000	0	0	0	0	0	0	0	50.364	0	0	0	0	39.7876	8	0	0	0	0	0	0	0	0	50.364	0	0	8						0.1
Godard et al.(2016)	Bedrock		43.8091	5.1719	625		3	2.55	1	0	780000	0	153	0	2000	0	0	0	0	0	0	0	47.566	0	0	0	0	37.5771	10	0	0	0	0	0	0	0	0	47.566	0	0	10						0.1
Godard et al.(2016)	Clasts		43.8084	5.1582	663		3	2.55	1	0	650000	0	153	0	2000	0	0	0	0	0	0	0	48.965	0	0	0	0	38.6824	5	0	0	0	0	0	0	0	0	48.965	0	0	5						0.1
Godard et al.(2016)	Bedrock		43.8084	5.1582	663		3	2.55	1	0	730000	0	153	0	2000	0	0	0	0	0	0	0	44.768	0	0	0	0	35.3667	7	0	0	0	0	0	0	0	0	44.768	0	0	7						0.1
Godard et al.(2016)	Clasts		43.797	5.231	660		3	2.55	1	0	1400000	0	153	0	2000	0	0	0	0	0	0	0	54.561	0	0	0	0	43.1032	2	0	0	0	0	0	0	0	0	54.561	0	0	2						0.1
Godard et al.(2016)	Bedrock		43.797	5.231	660		3	2.55	1	0	1370000	0	153	0	2000	0	0	0	0	0	0	0	53.162	0	0	0	0	41.998	2	0	0	0	0	0	0	0	0	53.162	0	0	2						0.1
Ott et al. (2019)	Gravel	Cl-617-2	35.342	25.6565	481.3		0.25	2.55	1	0	359132	0	153	0	2000	0	29.73	0.119	2.55	1.62	0.08	4.94	30.49	0.63	0.41	0.03	0	29.54	90.96	0	2	1.9	1.3	1.7	80	0	0.0791655	47.374	0	0.918403	90.9626						0.1
Ott et al. (2019)	Gravel	Cl-617-3	35.3333	25.6213	453		0.25	2.55	1	0	489000	0	153	0	2000	0	11.61	0.019	0.48	0.37	0.052	0.26	48.79	0.05	0.09	0.05	0	38.86	8.17	0	1.4	1.4	0.3	0.4	0	0	0.09	48.79	0.019	0.37	8.17						0.1
Ott et al. (2019)	Gravel	Cl-617-6	35.2787	24.8296	1408.7		0.25	2.55	1	0	360000	0	153	0	2000	0	6.98	0.029	0.85	0.35	0.047	0.3	50.3	0.17	0.18	0.04	0	40.55	3.98	0	1.3	1.1	0.4	0.4	0	0	0.18	50.3	0.029	0.35	3.98						0.1
Ott et al. (2019)	Gravel	Cl-617-8	35.377	24.1351	1213.2		0.25	2.55	1	0	582613	0	153	0	2000	0	10.02	0.015	0.31	0.48	0.014	12.99	33.16	0.08	0.06	0.03	0	41.4	205.66	0	0.4	0.4	2.5	0.2	0	0	0.032521	37.057	0.00338389	0.135264	205.658						0.1
Ott et al. (2019)	Gravel	Cl-617-10	35.3764	24.201	727.2		0.25	2.55	1	0	331315	0	153	0	2000	0	11.38	0.028	0.46	0.84	0.017	4.99	42.66	0.1	0.09	0.08	0	38.86	79.87	0	0.6	0.8	1.6	0.4	0	0	0.0360646	48.4878	0.004628	0.228732	79.8699						0.1
Ott et al. (2019)	Gravel	Cl-617-15	35.1975	24.0572	1061.6		0.25	2.55	1	0	474000	0	153	0	2000	0	3.95	0.029	0.85	0.35	0.047	0.3	50.3	0.17	0.18	0.04	0	40.55	168.06	0	0.2	0.2	2.8	0.2	0	0	0.05	38.85	0.012	0.3	168.06						0.1
Ott et al. (2019)	Sand	WC-616-8	35.2707	23.9638	1213		0.05	2.55	1	0	98973.4	0	153	0	2000	0	22.27	0.021	0.54	0.28	0.022	2.78	38.62	0.08	0.15	0.03	0	34.04	51.48	0	0.9	1.1	0.7	0.5	0	0	0.0371513	49.9494	0.00050905	0.0543026	51.4801						0.1
Avni et al. (2018)	Bedrock	MS-1br	33.319	35.805	2200		2	2.55	1	0	6320000	0	153	0	2000	0	0	0	0.3	0.1	0	0.6	54.3	0	0	0	0	43.2	25	0	0	0	0	0	0	0	0	55.3	0	0.1	25.6						0.1
Avni et al. (2018)	Bedrock	MS-2br	33.317	35.8	2170		3	2.55	1	0	4440000	0	153	0	2000	0	0	0	0.2	0.1	0	0.6	54.3	0	0	0	0	43.1	25	0	0	0	0	0	0	0	0	55.3	0	0.1	25.5						0.1
Avni et al. (2018)	Bedrock	MS-3br	33.311	35.797	1950		4.5	2.55	1	0	3.33e+06	0	153	0	2000	0	0	0	0.3	0.2	0	0.8	54	0	0	0	0	43	34	0	0	0	0	0	0	0	0	55.1	0	0.1	34.4						0.1
Avni et al. (2018)	Bedrock	MS-4br	33.31	35.798	1960		2	2.55	1	0	1420000	0	153	0	2000	0	0	0	0.5	0.3	0	0.8	53.3	0	0	0	0	42.5	46	0	0	0	0	0	0	0	0	55	0	0.1	45.9						0.1
Avni et al. (2018)	Bedrock	MS-5br	33.303	35.793	2070		4.5	2.55	1	0	4060000	0	153	0	2000	0	0	0	0.5	0.2	0	0.5	53.9	0	0	0	0	42.7	22	0	0	0	0	0	0	0	0	55.3	0	0.1	22.1						0.1
Avni et al. (2018)	Bedrock	MS-6br	33.311	35.794	2000		2.5	2.55	1	0	2780000	0	153	0	2000	0	0	0	0.1	0.1	0	0.5	54.7	0	0	0	0	43.4	31	0	0	0	0	0	0	0	0	55.4	0	0	30.9						0.1
Avni et al. (2018)	Bedrock	MS-7br	33.318	35.782	1980		5	2.55	1	0	5740000	0	153	0	2000	0	0	0	0.1	0.2	0	17	35.7	0	0	0	0	46.2	394	0	0	0	0	0	0	0	0	36	0	0.1	394.2						0.1
Avni et al. (2018)	Bedrock	MS-8br	33.306	35.779	1930		3	2.55	1	0	2750000	0	153	0	2000	0	0	0	0.1	0.1	0	0.7	52.9	0	0	0	0	41.8	27	0	0	0	0	0	0	0	0	55.2	0	0	37.2						0.1
Avni et al. (2018)	Bedrock	MS-9br	33.298	35.783	1930		3	2.55	1	0	4590000	0	153	0	2000	0	0	0	0.1	0.3	0	0.4	54.9	0	0	0	0	43.5	19	0	0	0	0	0	0	0	0	55.5	0	0.1	18.6						0.1
Avni et al. (2018)	Bedrock	MS-10br	33.309	35.758	1700		2	2.55	1	0	2630000	0	153	0	2000	0	0	0	0.2	0.1	0	0.6	54.8	0	0	0	0	43.6	27	0	0	0	0	0	0	0	0	55.3	0	0	26.7						0.1
Avni et al. (2018)	Bedrock	AR-1br	33.297	35.757	1420		1.5	2.55	1	0	730000	0	153	0	2000	0	0	0	0.4	0.2	0	0.7	54.1	0	0	0	0	43.2	32	0	0	0	0	0	0	0	0	55.2	0	0.1	31.5						0.1
Avni et al. (2018)	Bedrock	AR-2br	33.297	35.757	1429		2	2.55	1	0	1160000	0	153	0	2000	0	0	0	0	0.6	0	19.1	33.2	0	0	0	0	46.9	285	0	0	0	0	0	0	0	0	33.4	0	0.3	285.4						0.1
Avni et al. (2018)	Bedrock	AR-3br	33.298	35.756	1500		2	2.55	1	0	830000	0	153	0	2000	0	0	0	0.3	0.2	0	0.5	53.6	0	0	0	0	42.6	29	0	0	0	0	0	0	0	0	55.4	0	0.1	29.4						0.1
Avni et al. (2018)	Bedrock	AR-4br	33.299	35.755	1555		2	2.55	1	0	570000	0	153	0	2000	0	0	0	0.2	0.1	0	0.6	54.6	0	0	0	0	43.5	46	0	0	0	0	0	0	0	0	55.3	0	0.1	45.6						0.1
Avni et al. (2018)	Bedrock	AR-5br	33.3	35.755	1568		1.5	2.55	1	0	1090000	0	153	0	2000	0	0	0	0.5	0.5	0	0.7	53.3	0	0	0	0	42.6	34	0	0	0	0	0	0	0	0	55.1	0	0.2	33.6						0.1
Avni et al. (2018)	Bedrock	AR-6br	33.301	35.755	1615		2	2.55	1	0	1450000	0	153	0	2000	0	0	0	0.2	0.4	0	0.7	54	0	0	0	0	43.1	29	0	0	0	0	0	0	0	0	55.1	0	0.2	28.7						0.1
Avni et al. (2018)	Bedrock	AR-7br	33.301	35.753	1633		2.5	2.55	1	0	1630000	0	153	0	2000	0	0	0	0.2	0.2	0	0.7	54.5	0	0	0	0	43.5	29	0	0	0	0	0	0	0	0	55.2	0	0.1	29.2						0.1
Avni et al. (2018)	Sediment	AR-8sd	33.292	35.756	1458		3	2.55	1	0	480000	0	153	0	2000	0	0.1	0.1	0.8	0.5	0	1	52.7	0	0.1	0	0	42.4	31	0	0	0	0	0	0	0	0	54.7	0	0.2	31						0.1
Avni et al. (2018)	Bedrock	SN-1br	33.286	35.734	1411		5	2.55	1	0	1230000	0	153	0	2000	0	0	0	0.1	0.3	0	16.5	35.9	0	0	0	0	46.2	113	0	0	0	0	0	0	0	0	36.4	0	0.2	113						0.1
Avni et al. (2018)	Bedrock	SN-2br	33.286	35.732	1388		3	2.55	1	0	1370000	0	153	0	2000	0	0	0	0.1	0.1	0	0.5	55.1	0	0	0	0	43.8	20	0	0	0	0	0	0	0	0	55.4	0	0	20						0.1
Avni et al. (2018)	Bedrock	SN-3br	33.286	35.732	1390		3	2.55	1	0	1280000	0	153	0	2000	0	0	0	0.2	0.3	0	0.6	54	0	0	0	0	43	23	0	0	0	0	0	0	0	0	55.3	0	0.1	22.6						0.1
Avni et al. (2018)	Bedrock	SN-4br	33.287	35.731	1350		2	2.55	1	0	1400000	0	153	0	2000	0	0	0	0.2	0.1	0	0.5	54.3	0.3	0	0	0	43.2	22	0	0	0	0	0	0	0	0	55.1	0	0.1	22.3						0.1
Avni et al. (2018)	Bedrock	SN-5br	33.287	35.728	1247		4	2.55	1	0	800000	0	153	0	2000	0	0	0	0.1	0.1	0	0.4	55	0	0	0	0	43.6	15	0	0	0	0	0	0	0	0	55.5	0	0	15						0.1
Avni et al. (2018)	Bedrock	SN-6br	33.29	35.725	1105		3	2.55	1	0	730000	0	153	0	2000	0	0	0	0.1	0.1	0	0.5	54.9	0	0	0	0	43.6	25	0	0	0	0	0	0	0	0	55.4	0	0	24.8						0.1
Avni et al. (2018)	Bedrock	SN-7br	33.293	35.723	955		2	2.55	1	0	800000	0	153	0	2000	0	0	0	0.3	0.5	0	0.6	54.2	0	0	0	0	43.2	18	0	0	0	0	0	0	0	0	55.3	0	0.2	18						0.1
Avni et al. (2018)	Sediment	SN-8sd	33.293	35.723	1070		3	2.55	1	0	470000	0	153	0	2000	0	0	0	0.2	0.2	0	0.8	54.2	0	0	0	0	43.4	24	0	0	0	0	0	0	0	0	55.1	0	0.1	24.4						0.1
Avni et al. (2018)	Bedrock	SN-9br	33.292	35.722	940		3	2.55	1	0	520000	0	153	0	2000	0	0	0	0.1	0.3	0	0.3	55.1	0	0	0	0	43.6	13	0	0	0	0	0	0	0	0	55.6	0	0.1	13.4						0.1
Avni et al. (2018)	Sediment	SN-10sd	33.292	35.722	940		3	2.55	1	0	270000	0	153	0	2000	0	0	0	0.2	0.3	0	0.5	54.1	0	0	0	0	43	16	0	0	0	0	0	0	0	0	55.4	0	0.1	15.8						0.1
Avni et al. (2018)	Bedrock	SNA-1br	33.274	35.722	1140		3.5	2.55	1	0	1180000	0	153	0	2000	0	0	0	0.1	0.1	0	0.6	54.7	0	0	0	0	43.6	22	0	0	0	0	0	0	0	0	55	0	0.1	22						0.1
Avni et al. (2018)	Bedrock	SNA-2sbr	33.274	35.722	1140		2.5	2.55	1	0	800000	0	153	30	2000	0	0	0	0.1	0.1	0	0.6	55	0	0	0	0	43.7	24	0	0	0	0	0	0	0	0	55.4	0	0	24.1						0.1
Avni et al. (2018)	Bedrock	SNA-5br	33.273	35.712	1077		4	2.55	1	0	1410000	0	153	0	2000	0	0	0	0.1	0.1	0	0.5	54.7	0	0	0	0	43.5	21	0	0	0	0	0	0	0	0	55.4	0	0	21.4						0.1
Avni et al. (2018)	Bedrock	SNA-6br	33.269	35.706	918		4	2.55	1	0	2.04e+06	0	153	0	2000	0	0	0	0	0.5	0	21.4	30.5	0	0	0	0	47.3	224	0	0	0	0	0	0	0	0	30.6	0	0.4	224.2						0.1
Avni et al. (2018)	Bedrock	SNA-7br	33.267	35.705	815		6	2.55	1	0	1010000	0	153	0	2000	0	0	0	0.2	0.1	0	0.4	54.5	0	0	0	0	43.2	13	0	0	0	0	0	0	0	0	55.6	0	0	13.3						0.1
Avni et al. (2018)	Bedrock	SNA-8br	33.261	35.7	720		3	2.55	1	0	990000	0	153	0	2000	0	0	0	0.1	0.2	0	0.4	54.7	0	0	0	0	43.4	23	0	0	0	0	0	0	0	0	55.5	0	0	22.7						0.1
Avni et al. (2018)	Bedrock	SNA-9br	33.257	35.696	550		4	2.55	1	0	1370000	0	153	0	2000	0	0	0	0.1	0.2	0	0.4	54.7	0	0	0	0	43.3	15	0	0	0	0	0	0	0	0	55.5	0	0.1	15.3						0.1
Avni et al. (2018)	Bedrock	SNA-10br	33.256	35.693	428		5	2.55	1	0	1560000	0	153	0	2000	0	0	0	0	0	0	0.4	55.2	0	0	0	0	43.7	23	0	0	0	0	0	0	0	0	55.6	0	0	22.9						0.1
Avni et al. (2018)	Bedrock	SNA-11br	33.255	35.692	400		5	2.55	1	0	1980000	0	153	0	2000	0	0	0	0.1	0	0	0.4	55	0	0	0	0	43.6	22	0	0	0	0	0	0	0	0	55.5	0	0	21.9						0.1
Avni et al. (2018)	Bedrock	SNA-12br	33.255	35.692	400		4.5	2.55	1	0	1200000	0	153	30	2000	0	0	0	0.1	0.1	0	0.4	55	0	0	0	0	43.6	20	0	0	0	0	0	0	0	0	55.5	0	0	19.6						0.1
Avni et al. (2018)	Sediment	SNA-13sd	33.255	35.692	400		3	2.55	1	0	820000	0	153	0	2000	0	0	0	0.1	0.1	0	0.4	54.7	0	0	0	0	43.4	20	0	0	0	0	0	0	0	0	55.5	0	0	19.6						0.1
Ben-Asher et al. (2021)	Soil covered bedrock	G 0	31.3619	34.8289	398		4	2.55	1	0	850000	0	153	54.4	2000	0	10.8152	0.00465749	1.11225	0.129323	0.73546	1.03677	47.4544	0.118547	0.218909	0	0	38.3745	4.49785	5.21236	0	0	0.53029	0	42.2374	9.6722	0.0293909	54.4219	0.00187223	0.147993	4.49785
Ben-Asher et al. (2021)	Soil covered bedrock	Ga 36	31.3619	34.8289	398		15	2.55	1	0	2.04e+06	0	153	54.4	2000	0	2.19075	0.000903238	0.0969831	0.0240313	0.0795944	0.387317	54.2212	0.0110811	0.0121728	0	0	42.9759	4.55117	1.13327	0	0	0.353766	0	7.10841	1.78703	0.00183236	55.5494	0.000263075	0.0238933	4.55117
Ben-Asher et al. (2021)	Soil covered bedrock	GA 51	31.3619	34.8289	398		10	2.55	1	0	2230000	0	153	54.4	2000	0	3.04919	0.00094698	0.15323	0.025174	0.0954741	0.473224	53.5948	0.00731671	0.0225827	0	0	42.5781	7.32985	0.942095	0	0	0.293579	0	8.11244	2.08108	0.0016222	55.4615	0.000248407	0.025006	7.32985
Ben-Asher et al. (2021)	Soil covered bedrock	GA 73	31.3619	34.8289	398		5	2.55	1	0	1580000	0	153	54.4	2000	0	1.91416	0.000784659	0.0928357	0.0202076	0.0545697	0.442913	54.3342	0.00778419	0.00724935	0	0	43.1253	3.42322	0.796184	0	0	0.294643	0	10.9078	2.14327	0.00159727	55.4932	0.000236567	0.0199905	3.42322
Ben-Asher et al. (2021)	Soil covered bedrock	GA82	31.3619	34.8289	398		11	2.55	1	0	1520000	0	153	54.4	2000	0	2.564	0.00103901	0.104209	0.0217263	0.0728722	0.445286	53.9496	0.00799818	0.00729552	0	0	42.826	3.49639	1.5058	0	0	0.26251	0	10.1843	2.45371	0.00180374	55.4978	0.000227963	0.021429	3.49639
Ben-Asher et al. (2021)	Exposed bedrock	GA1	31.3619	34.8289	398		2	2.55	1	0	3.92e+06	0	153	0	2000	0	2.03871	0.00084326	0.168253	0.0258238	0.0792988	0.364718	54.2858	0.0126239	0.0219406	0	0	43.0019	6.35104	1.28896	0	0	0.283303	0	6.35633	1.78316	0.00426351	55.6118	0.000329626	0.0259191	6.35104
Ben-Asher et al. (2021)	Soil covered bedrock	GB 1	31.3619	34.8289	398		2.5	2.55	1	0	1360000	0	153	104.4	2000	0	3.64095	0.00113066	0.188649	0.0327348	0.0723963	0.746126	52.9288	0.0131291	0.0226428	0	0	42.3534	12.1204	1.56744	0	0	0.371671	0	9.1994	2.79522	0.00245597	55.2898	0.00032079	0.0335024	12.1204
Ben-Asher et al. (2021)	Soil covered bedrock	RMA 1	32.5601	35.1195	241		3.5	2.55	1	0	530000	0	153	13.5	2000	0	12.4673	0.00662753	0.825676	0.261079	0.593906	0.417477	47.5019	0.0364163	0.154216	0	0	37.7355	16.644	7.81485	0	0	1.06024	0	30.5767	9.21791	0.0258616	55.1946	0.00142983	0.299069	16.644
Ben-Asher et al. (2021)	Clasts	RMA 3	32.5601	35.1195	241		3	2.55	1	0	520000	0	153	0	2000	0	66.9458	0.00486751	1.5133	0.129509	0.535593	0.59297	16.4074	0.0705229	0.275963	0	0	13.5241	33.9051	6.33103	0	0	0.251278	0	47.4893	10.6923	0.125886	54.5407	0.00297285	0.417336	33.9051
Ben-Asher et al. (2021)	Soil covered bedrock	RMA 4	32.5601	35.1195	241		0	2.55	1	0	430000	0	153	18	2000	0	20.9816	0.00605229	1.07997	0.240323	0.513725	0.387865	42.6654	0.0332181	0.184303	0	0	33.9075	10.7172	4.44607	0	0	0.832966	0	41.1885	9.32663	0.0251965	55.1389	0.00170378	0.306796	10.7172
Ben-Asher et al. (2021)	Soil covered bedrock	RMD	32.5601	35.1195	241		3.5	2.55	1	0	290000	0	153	58.5	2000	0	37.3857	0.00381945	0.643322	0.115584	0.341845	0.505704	33.7778	0.0530923	0.112003	0	0	27.0611	9.71241	1.8694	0	0	0.526095	0	23.7055	7.75665	0.0188783	55.0962	0.00138521	0.185103	9.71241
Ben-Asher et al. (2021)	Soil covered bedrock	ZTA 1	33.002	35.4855	776		3.5	2.55	1	0	350000	0	153	12	2000	0	3.33185	0.00389829	0.404895	0.0266045	0.223223	0.429672	53.2364	0.0560456	0.0381973	0	0	42.2492	15.6863	4.52253	0	0	4.77208	0	70.0553	4.00666	0.00672784	55.4505	0.000352908	0.025452	15.6863
Ben-Asher et al. (2021)	Soil covered bedrock	ZTA 2	33.002	35.4855	776		3.5	2.55	1	0	410000	0	153	12	2000	0	3.85547	0.0033197	0.462647	0.0257637	0.195464	0.360546	53.013	0.0507727	0.0346194	0	0	41.9984	18.3811	4.32638	0	0	5.33494	0	76.2347	3.70548	0.00261331	55.4958	0.000326761	0.0249637	18.3811
Ben-Asher et al. (2021)	Soil covered bedrock	ZTA 3	33.002	35.4855	776		3.5	2.55	1	0	420000	0	153	6	2000	0	4.923	0.00434227	0.749572	0.166505	0.257842	0.245797	52.2609	0.059167	0.0500186	0	0	41.2829	18.0868	3.78056	0	0	5.41158	0	97.8553	4.04767	0.0123756	55.4315	0.000639063	0.174022	18.0868
Ben-Asher et al. (2021)	Soil covered bedrock	GLA 1	32.5304	35.3644	232		3.5	2.55	1	0	730000	0	153	76.8	2000	0	2.78445	0.00087425	0.0950079	0.0248554	0.0634698	0.347975	53.9414	0.0163902	0.0121911	0	0	42.7134	10.4669	3.18197	0	0	0.555913	0	14.04	1.47749	0.00238571	55.5974	0.000274147	0.0249458	10.4669
Ben-Asher et al. (2021)	Exposed bedrock	GLA 4	32.5304	35.3644	232		1.75	2.55	1	0	1130000	0	153	0	2000	0	0.368511	0.000246871	0.0225994	0.0134104	0.00943585	0.4604	55.2456	0.0173904	0.00281559	0	0	43.8596	5.87386	0.250177	0	0	0.370204	0	6.00455	1.65712	0.00174323	55.4668	0.000104469	0.013329	5.87386
Ben-Asher et al. (2021)	Clasts	GLA 6	32.5304	35.3644	232		3	2.55	1	0	1510000	0	153	0	2000	0	0.551924	0.000656749	0.0567316	0.0185869	0.0362025	0.398962	55.1777	0.0122173	0.00765347	0	0	43.7393	8.17367	1.31861	0	0	0.547514	0	14.762	1.66406	0.00203925	55.5412	0.000157321	0.0183137	8.17367
Ben-Asher et al. (2021)	Soil covered bedrock	GLB	32.5304	35.3644	232		7	2.55	1	0	1340000	0	153	43	2000	0	0.53927	0.000513234	0.044964	0.0131216	0.0248115	0.325347	55.29	0.00923291	0.00571027	0	0	43.747	11.8844	1.45038	0	0	0.827658	0	25.4196	0.545206	0.00178449	55.6286	6.26017e-05	0.0126498	11.8844
Ben-Asher et al. (2021)	regolith	MEA 2	32.9848	35.3956	910		3	2.55	1	0	820000	0	153	11.2	2000	0	2.61551	0.000387378	0.0402091	0.00747824	0.010318	23.0378	27.5054	0.0295671	0.0101774	0	0	46.7431	240.805	9.34277	0	0	1.06197	0	1.66939	5.03254	0.00304877	28.2543	0.000334264	0.00764081	240.805
Ben-Asher et al. (2021)	regolith	MEA 3	32.9848	35.3956	910		4	2.55	1	0	380000	0	153	7	2000	0	2.33846	0.00110941	0.175144	0.0101323	0.10053	22.8863	27.6723	0.0334142	0.073881	0	0	46.7087	76.5887	7.07075	0	0	1.89891	0	7.62353	8.98372	0.0080333	28.412	0.000594479	0.01004	76.5887
Ben-Asher et al. (2021)	Exposed bedrock	MEA 4	32.9848	35.3956	910		0	2.55	1	0	390000	0	153	5.6	2000	0	0.676367	0.000443678	0.0281815	0.00809476	0.0144624	23.4604	28.1026	0.0243944	0.0117774	0	0	47.6733	99.8935	3.98625	0	0	0.80216	0	1.93095	4.29943	0.00177823	28.3046	0.000351216	0.00809384	99.8935
Ben-Asher et al. (2021)	Clasts	MEA 5	32.9848	35.3956	910		4	2.55	1	0	400000	0	153	0	2000	0	1.09858	0.00098833	0.142578	0.0140341	0.0941314	22.2567	29.1435	0.0237769	0.0498573	0	0	47.1758	69.4763	4.10552	0	0	0.868252	0	3.90818	6.60544	0.0025019	29.532	0.000523598	0.0139401	69.4763
Ben-Asher et al. (2021)	Exposed bedrock	MEB	32.9848	35.3956	910		1.5	2.55	1	0	290000	0	153	0	2000	0	0.559102	0.000722444	0.0941369	0.0117258	0.0804142	23.1758	28.4252	0.0195403	0.0176654	0	0	47.6157	56.3349	1.40735	0	0	1.62629	0	4.67598	4.87485	0.00166621	28.6287	0.000449041	0.0115041	56.3349
Yang et al. (2020)	Exposed bedrock	GZ01	26.4	106.52	1235		3	2.55	1	0	825000	0	153	5	2000	0	0.000661269	1.82	0.01	0.25	0.14	0	1.04	53.98	0.5	0.33		42.37	53.5		0.21	0.2	0.26	1.13		2.51	0.03	54.22	0.18	0.01	53.5
Yang et al. (2020)	Exposed bedrock	BJ01	39.78	115.93	310		3	2.55	1	0	508000	0	153	5	2000	0	0.000620783	3.6	0.02	1.08	0.18	0.01	8.36	32.6	3.23	0.59		25.59	94.5		0.54	0.47	0.82	0.3		18.2	0.02	30.19	0.01	0.02	94.5
Yang et al. (2020)	Exposed bedrock	BJ02	39.78	115.93	310		3	2.55	1	0	535000	0	153	5	2000	0	0.000580297	2.82	0.02	0.22	1.25	0.05	2.63	50.86	0.61	0.08		39.91	25.3		1.26	1.29	1.11	0.36		1.36	0.01	54.85	0.34	0.02	25.3
Yang et al. (2020)	Exposed bedrock	GS01	36.33	104	1740		3	2.55	1	0	235000	0	153	5	2000	0	0.000539811	0.57	0.01	0.15	0.09	0.02	0.32	54.92	1.17	0.09		43.09	20.9		0.29	0.33	0.31	0.22		0.75	0.01	53.9	0.02	0.01	20.9
Yang et al. (2020)	Exposed bedrock	GS02	35.88	103.83	2100		3	2.55	1	0	3204000	0	153	5	2000	0	0.000499325	1.67	0.01	0.25	0.12	0.01	1.78	53.72	0.39	0.06		42.15	4.9		0.31	0.51	0.64	0.89		1.49	0.01	51.45	0.01	0.01	4.9
Yang et al. (2020)	Exposed bedrock	GS03	36.83	103.22	2300		3	2.55	1	0	11614000	0	153	5	2000	0	0.000458839	36.06	0.38	4.93	3.55	0.12	5.96	17.41	2.87	1.28		13.66	117.1		3.51	4.79	6.81	7.61		76.19	0.12	55.52	1.78	0.38	117.1
[truncated: 32 more columns]
