# Supplementary material for: Erosion and weathering in carbonate regions reveal climatic and tectonic drivers of carbonate landscape evolution
Source: Copernicus journal article supplement (doi:10.5194/esurf-11-247-2023), 2023-03-29
Supplement: Supplementary file 2 [file esurf-11-247-2023-supplement.zip]

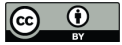

*Supplement of*

**Erosion and weathering in carbonate regions reveal climatic and tectonic drivers of carbonate landscape evolution**

**Richard Ott et al.**

*Correspondence to:* Richard Ott ([richard.ott@gfz-potsdam.de](mailto:richard.ott@gfz-potsdam.de))

- [esurf-11-247-2023-supplement-title-page.pdf](#)
- [Supplement.pdf](#)
- [Tab\\_S1.xlsx](#)

The copyright of individual parts of the supplement might differ from the article licence.
