# Supplementary material for: Erosion and weathering in carbonate regions reveal climatic and tectonic drivers of carbonate landscape evolution
Source: Copernicus journal article supplement (doi:10.5194/esurf-11-247-2023), 2023-03-29
Supplement: Supplementary file 3 [file esurf-11-247-2023-supplement.zip]

Archive with 3 entries (3 files):
- Tab_S1.xlsx
- esurf-11-247-2023-supplement-title-page.pdf
- Supplement.pdf
